# 1 Evolution analysis and expression divergence of the chitinase gene family 2 against *Leptosphaeria maculans* and *Sclerotinia sclerotiorum* infection in 3 *Brassica napus*

4 Wen Xu<sup>1</sup>, Tengsheng Zhou<sup>2</sup>, Bo An<sup>2</sup>, Baojiang Xu<sup>3</sup>, Genyi Li<sup>1,2\*</sup>

5 1 Crop Designing Center, Henan Academy of Agricultural Sciences, Zhengzhou, 450002, China

6 2 Department of Plant Science, University of Manitoba, Winnipeg, MB R3T 2N2, Canada

7 3 Henan Academy of Agricultural Sciences, Zhengzhou, 450002, China

8 **Abstract:** Blackleg and sclerotinia stem rot caused by *Leptosphaeria maculans* and *Sclerotinia sclerotiorum* respectively are two  
9 major diseases in rapeseed worldwide, which cause serious yield losses. Chitinases are pathogenesis-related proteins and play  
10 important roles in host resistance to various pathogens and abiotic stress responses. However, a systematic investigation of the  
11 chitinase gene family and its expression profile against *L. maculans* and *S. sclerotiorum* infection in rapeseed remains elusive. The  
12 recent release of assembled genome sequence of rapeseed allowed us to perform a genome-wide identification of the chitinase gene  
13 family. In this study, 68 chitinase genes were identified in *Brassica napus* genome. These genes were divided into five different  
14 classes and distributed among 15 chromosomes. Evolutionary analysis indicated that the expansion of the chitinase gene family was  
15 mainly attributed to segmental and tandem duplication. Moreover, the expression profiling of the chitinase gene family was  
16 investigated using RNA sequencing (RNA-Seq) and the results revealed that some chitinase genes were both induced while the other  
17 members exhibit distinct expression in response to *L. maculans* and *S. sclerotiorum* infection. This study presents a comprehensive  
18 survey of the chitinase gene family in *B. napus* and provides valuable information for further understanding the functions of the  
19 chitinase gene family.

20 **Keywords:** *Brassica napus*; chitinase gene family; expression pattern; *Leptosphaeria maculans*; *Sclerotinia sclerotiorum*

## 22 1. Introduction

23 Plant chitinases (EC 3.2.1.14) are enzymes that hydrolyze the N-acetyl glucosamine polymer chitin, a major component of fungal  
24 cell walls and exoskeleton of insects (COLLINGE *et al.* 1993) and are considered as one group of pathogenesis-related (PR) proteins  
25 (LEGRAND *et al.* 1987), which can be induced in response to the infection of various pathogenic micro-organisms. In the light of  
26 classification of glycosyl hydrolases based on amino acid sequence similarities, plant chitinases have been put in glycoside hydrolase  
27 family 18 (GH-18) and 19 (GH-19) (HENRISSAT 1991). According to the CAZy database ([http://www.cazy.org/Glycoside-  
28 Hydrolases.html](http://www.cazy.org/Glycoside-Hydrolases.html)) (CANTAREL *et al.* 2009), plant chitinases have been grouped into five different classes ranging from I to V. Of these,  
29 classes I, II and IV belong to the GH-19 family whereas the GH-18 family are composed of classes III and V chitinases (HENRISSAT  
30 1991). The details of plant chitinase classification are described as follows. Class I chitinases have an N-terminal chitin-binding  
31 domain and a GH-19 catalytic domain. Class II chitinases consist of only a catalytic domain with a high level of sequence and  
32 structure similarity to class I chitinases but lack the chitin-binding domain and linker regions. Class IV chitinases show high homology  
33 with class I chitinases but are smaller due to one deletion in the chitin-binding domain and three deletions in the catalytic domain (XU  
34 *et al.* 2016). Both class III and V chitinases have a GH-18 catalytic domain and a consensus sequence DXDXE, but there is no

35 homology for other amino acids (UMEMOTO *et al.* 2015). GH-18 chitinases are widely distributed in plants, animals, fungi, bacteria  
36 and viruses whereas GH-19 members almost exclusively exist in higher plants (PASSARINHO and DE VRIES 2002).

37 In higher plants, the expression of chitinase genes is involved in defense against biotic and abiotic stress as well as in growth and  
38 developmental processes (COLLINGE *et al.* 1993; PUNJA and ZHANG 1993). For instance, a class III chitinase gene, *Mtchitinase III-3*,  
39 has been found to be induced upon the infection of fungi *Glomus mosseae* and *Glomus intraradices* in cortical root (BONANOMI *et al.*  
40 2001). PSCHI4, a putative extracellular class II chitinase, is up-regulated in pine seedlings infected with the necrotrophic pathogen  
41 *Fusarium subglutinans* f. sp. *Pini* (DAVIS *et al.* 2002). In *Arabidopsis thaliana*, a class IV chitinase gene *AtchitIV* accumulated very  
42 rapidly in leaves after inoculation with *Xanthomonas campestris* and reached maximum mRNA accumulation after one hour infection  
43 (GERHARDT *et al.* 1997). In addition, several transgenic studies showed that enhanced levels of chitinase genes in transgenic plants can  
44 indeed improve resistance against pathogens and reduce the damage caused by fungi and some insect pests (LIN *et al.* 1995; DING *et al.*  
45 1998; YAMAMOTO *et al.* 2000; WANG *et al.* 2005; PRASAD *et al.* 2013; CHEN *et al.* 2014). There are several reports of induced  
46 expression of plant chitinases when plants were exposed to abiotic stresses such as heavy-metal stress (BEKESIOVA *et al.* 2008),  
47 drought (HONG and HWANG 2002; LEE *et al.* 2008), salt (HONG and HWANG 2002), cold (YEH *et al.* 2000), heat (KWON *et al.* 2007),  
48 UV light and wounding (BREDERODE *et al.* 1991). Furthermore, some chitinases are essential in physiological processes like somatic  
49 embryo development (DEJONG *et al.* 1992) and formation of root nodules (OVTSYNA *et al.* 2000). In conclusion, chitinases play  
50 important roles in plant defense and plant health.

51 Rapeseed (*Brassica napus*) is an important oilseed crop worldwide. This crop is affected by various fungal pathogens, especially  
52 blackleg caused by *Leptosphaeria maculans* and sclerotinia stem rot by *Sclerotinia sclerotiorum*, which are the most destructive  
53 rapeseed diseases in Canada, Australia, Europe and many other regions around the world (WEST *et al.* 2001). Recently, a few studies  
54 have been conducted on chitinase genes responding to some pathogens infection in *B. napus* (RASMUSSEN *et al.* 1992a; RASMUSSEN *et al.*  
55 1992b; GRISON *et al.* 1996; WANG *et al.* 2005; AHMED *et al.* 2012). For example, constitutive overexpression of a chimeric  
56 chitinase gene in rapeseed had been shown to exhibit an increased resistance to three fungal pathogens compared with their  
57 nontransgenic parental plants (GRISON *et al.* 1996). Co-expression of defensin gene *Rs-AFPI* from *R. sativus* and chimeric chitinase  
58 gene *chit42* from *T. atroviride* in rapeseed via *Agrobacterium*-mediated transformation demonstrated enhanced resistance against  
59 sclerotinia stem rot disease (ZARINPANJEH *et al.* 2016). In addition, global studies of transcriptome dynamics of defense responses to *L.*  
60 *maculans* and *S. sclerotiorum* in *B. napus* presented that pathogen responsive genes including chitinases were rapidly induced during  
61 early infection (LOWE *et al.* 2014; HADDADI *et al.* 2016; JOSHI *et al.* 2016; WU *et al.* 2016). However, to date, the chitinase genes in  
62 rapeseed have not been systematically identified and thus the genetic resistance to *L. maculans* and *S. sclerotiorum* has been not yet  
63 studied. Recently, the availability of the whole genome sequence and RNA-seq sequencing enable further investigations into chitinase  
64 genes and their response to *L. maculans* and *S. sclerotiorum* infection on a genome-wide scale (CHALHOUB *et al.* 2014; WOODHOUSE  
65 *et al.* 2014).

66 To further extend the understanding of the chitinase gene family, a global analysis, including identification, sequence features,  
67 physical location, the evolutionary relationship and expression pattern of the chitinase gene family in response to *L. maculans* and *S.*  
68 *sclerotiorum* infection in *B. napus* using the RNA-seq sequencing data collected in our lab and some transcriptome data from NCBI  
69 database was performed. Expression analysis revealed that some chitinase genes were induced by both pathogens while others  
70 displayed differential expression pattern in response to *L. maculans* and *S. sclerotiorum* infection, suggesting that they may have  
71 distinct roles in different pathogens stress response. Together, our findings will be helpful for further understanding of the functions of  
72 the chitinase gene family against different stress in rapeseed.

## 73 2. Results

### 74 2.1 Identification and phylogenetic analysis of the chitinase gene family in *B. napus*

The complete genome sequence and gene annotation was used for the genome-wide identification of the chitinase gene family and a total of 68 putative chitinase genes were identified in the *B. napus* genome (Table 1). All these identified proteins have at least one typical “Glyco\_hydro\_19” or “Glyco\_hydro\_18” domain which is responsible for catalyzing the degradation of chitin. Of these, GH-18 family and GH-19 family include 12 and 56 putative chitinase genes, respectively. These chitinase genes in *B. napus* encode proteins ranging from 130 to 1005 amino acids in length with an average of 294. The average number of exons among these chitinase genes was 3.04, a value that is smaller than the average number of exons among all predicted *B. napus* genes (4.9). BLAST search of these 68 proteins against NCBI non-redundant database showed that the top matched hits were endochitinases, chitinases, chitinase-like proteins, which further confirm the reliability of the identified chitinase genes. Furthermore, the signal peptides in 54 predicted chitinase sequences were also identified. To examine the evolutionary relationships among the chitinase genes in *B. napus*, sequence alignment was performed with amino acid sequences (Supplementary Table 1) and an unrooted phylogenetic tree of the 68 chitinase genes using neighbor-joining method was constructed (Figure 1).

Table 1 Chitinase genes in the *B.napus* genome and and their sequence characteristics

| Gene          | Family         | Class | Chr | Start    | End      | Strand | Protein Length(aa) | Number of Exons | Signal Peptide |
|---------------|----------------|-------|-----|----------|----------|--------|--------------------|-----------------|----------------|
| BnaA01g30550D | Glyco_hydro_19 | I     | A01 | 20941303 | 20942028 | +      | 130                | 1               | YES            |
| BnaA01g30560D | Glyco_hydro_19 | I     | A01 | 20943578 | 20945861 | +      | 145                | 4               | YES            |
| BnaA03g32270D | Glyco_hydro_19 | I     | A03 | 15569491 | 15570916 | -      | 168                | 3               | NO             |
| BnaA03g32280D | Glyco_hydro_19 | I     | A03 | 15575380 | 15578982 | -      | 190                | 6               | YES            |
| BnaA05g26640D | Glyco_hydro_19 | I     | A05 | 19447511 | 19449216 | +      | 196                | 2               | YES            |
| BnaC01g38390D | Glyco_hydro_19 | I     | C01 | 37477744 | 37480353 | -      | 216                | 3               | YES            |
| BnaC01g38450D | Glyco_hydro_19 | I     | C01 | 37494610 | 37495630 | -      | 227                | 2               | NO             |
| BnaC03g37570D | Glyco_hydro_19 | I     | C03 | 23003071 | 23005099 | -      | 231                | 4               | YES            |
| BnaC03g37600D | Glyco_hydro_19 | I     | C03 | 23016407 | 23018656 | -      | 239                | 3               | YES            |
| BnaC03g37610D | Glyco_hydro_19 | I     | C03 | 23021408 | 23025003 | -      | 242                | 2               | YES            |
| BnaC05g40680D | Glyco_hydro_19 | I     | C05 | 38780461 | 38782151 | +      | 245                | 2               | YES            |
| BnaA08g31740D | Glyco_hydro_19 | II    | A08 | 2107446  | 2110073  | +      | 245                | 3               | YES            |
| BnaA09g00340D | Glyco_hydro_19 | II    | A09 | 146643   | 148245   | -      | 245                | 2               | YES            |
| BnaA10g01020D | Glyco_hydro_19 | II    | A10 | 536566   | 537828   | -      | 255                | 2               | YES            |
| BnaA10g03880D | Glyco_hydro_19 | II    | A10 | 2063411  | 2066519  | -      | 255                | 3               | YES            |
| BnaC05g01140D | Glyco_hydro_19 | II    | C05 | 600283   | 601194   | -      | 256                | 2               | YES            |
| BnaC05g03990D | Glyco_hydro_19 | II    | C05 | 1957654  | 1959846  | -      | 257                | 3               | YES            |
| BnaC05g36460D | Glyco_hydro_19 | II    | C05 | 35739352 | 35741554 | +      | 261                | 9               | YES            |
| BnaC08g01540D | Glyco_hydro_19 | II    | C08 | 1206975  | 1209667  | -      | 261                | 3               | YES            |
| BnaCnng01370D | Glyco_hydro_19 | II    | Cnn | 1527030  | 1528502  | +      | 263                | 2               | YES            |
| BnaC07g30330D | Glyco_hydro_18 | III   | C07 | 34864788 | 34866603 | +      | 263                | 3               | YES            |
| BnaC09g04600D | Glyco_hydro_18 | III   | C09 | 2638283  | 2639657  | +      | 263                | 3               | YES            |
| BnaA09g05050D | Glyco_hydro_18 | III   | A09 | 2477135  | 2478513  | +      | 264                | 3               | NO             |
| BnaA06g26630D | Glyco_hydro_18 | III   | A06 | 18298306 | 18300242 | -      | 307                | 3               | YES            |
| BnaA03g20290D | Glyco_hydro_19 | IV    | A03 | 9648039  | 9649318  | -      | 269                | 3               | YES            |
| BnaA03g20300D | Glyco_hydro_19 | IV    | A03 | 9652001  | 9653298  | -      | 269                | 3               | YES            |
| BnaA03g20310D | Glyco_hydro_19 | IV    | A03 | 9663327  | 9664876  | -      | 272                | 2               | YES            |
| BnaA03g20320D | Glyco_hydro_19 | IV    | A03 | 9678956  | 9680269  | -      | 272                | 2               | YES            |
| BnaA03g20330D | Glyco_hydro_19 | IV    | A03 | 9684457  | 9685621  | -      | 274                | 2               | YES            |
| BnaA03g20340D | Glyco_hydro_19 | IV    | A03 | 9698939  | 9700499  | -      | 275                | 2               | YES            |

|               |                |    |     |          |          |   |      |    |     |
|---------------|----------------|----|-----|----------|----------|---|------|----|-----|
| BnaA03g56430D | Glyco_hydro_19 | IV | A03 | 711494   | 712848   | + | 275  | 2  | YES |
| BnaA04g25220D | Glyco_hydro_19 | IV | A04 | 18233599 | 18234851 | - | 275  | 2  | NO  |
| BnaA04g25230D | Glyco_hydro_19 | IV | A04 | 18235520 | 18236868 | - | 279  | 2  | NO  |
| BnaA05g03420D | Glyco_hydro_19 | IV | A05 | 1888936  | 1890632  | - | 279  | 3  | YES |
| BnaA05g03430D | Glyco_hydro_19 | IV | A05 | 1893397  | 1894609  | - | 280  | 2  | YES |
| BnaA05g03440D | Glyco_hydro_19 | IV | A05 | 1904615  | 1905892  | - | 280  | 2  | YES |
| BnaA05g08640D | Glyco_hydro_19 | IV | A05 | 4802795  | 4804226  | + | 281  | 2  | YES |
| BnaA09g15430D | Glyco_hydro_19 | IV | A09 | 8977793  | 8978880  | + | 281  | 2  | YES |
| BnaA09g15440D | Glyco_hydro_19 | IV | A09 | 8979421  | 8980691  | + | 281  | 2  | NO  |
| BnaA09g34290D | Glyco_hydro_19 | IV | A09 | 25164422 | 25167344 | + | 281  | 6  | YES |
| BnaA10g05680D | Glyco_hydro_19 | IV | A10 | 3646850  | 3650151  | - | 282  | 2  | YES |
| BnaC03g19370D | Glyco_hydro_19 | IV | C03 | 10063312 | 10065182 | - | 282  | 2  | YES |
| BnaC03g24270D | Glyco_hydro_19 | IV | C03 | 13607893 | 13609216 | - | 282  | 2  | YES |
| BnaC03g24280D | Glyco_hydro_19 | IV | C03 | 13614270 | 13615575 | - | 282  | 3  | YES |
| BnaC03g24290D | Glyco_hydro_19 | IV | C03 | 13628566 | 13630189 | - | 283  | 2  | YES |
| BnaC03g24300D | Glyco_hydro_19 | IV | C03 | 13641790 | 13643090 | - | 284  | 2  | YES |
| BnaC03g24310D | Glyco_hydro_19 | IV | C03 | 13644193 | 13644910 | - | 302  | 2  | YES |
| BnaC03g24330D | Glyco_hydro_19 | IV | C03 | 13646581 | 13649085 | - | 302  | 2  | YES |
| BnaC03g24340D | Glyco_hydro_19 | IV | C03 | 13654943 | 13656106 | - | 302  | 2  | NO  |
| BnaC03g24360D | Glyco_hydro_19 | IV | C03 | 13695822 | 13697335 | - | 318  | 2  | YES |
| BnaC04g09720D | Glyco_hydro_19 | IV | C04 | 7384173  | 7385277  | + | 319  | 5  | YES |
| BnaC04g48920D | Glyco_hydro_19 | IV | C04 | 47325431 | 47326573 | + | 320  | 2  | YES |
| BnaC04g49090D | Glyco_hydro_19 | IV | C04 | 47408585 | 47409809 | - | 322  | 2  | NO  |
| BnaC04g49100D | Glyco_hydro_19 | IV | C04 | 47411832 | 47413177 | - | 322  | 2  | YES |
| BnaC04g53030D | Glyco_hydro_19 | IV | C04 | 680771   | 682319   | - | 322  | 3  | YES |
| BnaC04g53040D | Glyco_hydro_19 | IV | C04 | 688006   | 689125   | - | 322  | 2  | NO  |
| BnaC08g25190D | Glyco_hydro_19 | IV | C08 | 27018000 | 27020278 | + | 323  | 6  | NO  |
| BnaC08g25210D | Glyco_hydro_19 | IV | C08 | 27024727 | 27025633 | + | 329  | 2  | NO  |
| BnaC09g51720D | Glyco_hydro_19 | IV | C09 | 948730   | 950079   | - | 334  | 3  | YES |
| BnaCnng39650D | Glyco_hydro_19 | IV | Cnn | 38235388 | 38236682 | + | 342  | 3  | YES |
| BnaC03g63440D | Glyco_hydro_18 | V  | C03 | 52860028 | 52861720 | + | 346  | 3  | NO  |
| BnaA01g34980D | Glyco_hydro_18 | V  | A01 | 304675   | 306686   | + | 363  | 3  | YES |
| BnaUnng03570D | Glyco_hydro_18 | V  | Unn | 5067935  | 5068651  | - | 371  | 1  | NO  |
| BnaA03g26800D | Glyco_hydro_18 | V  | A03 | 13187584 | 13189629 | + | 381  | 8  | YES |
| BnaA03g26330D | Glyco_hydro_18 | V  | A03 | 12888937 | 12890809 | + | 383  | 3  | YES |
| BnaC03g31740D | Glyco_hydro_18 | V  | C03 | 19525415 | 19530521 | + | 424  | 18 | YES |
| BnaA08g09330D | Glyco_hydro_18 | V  | A08 | 8944530  | 8946552  | - | 513  | 3  | YES |
| BnaC01g41020D | Glyco_hydro_18 | V  | C01 | 240723   | 242688   | + | 1005 | 5  | YES |

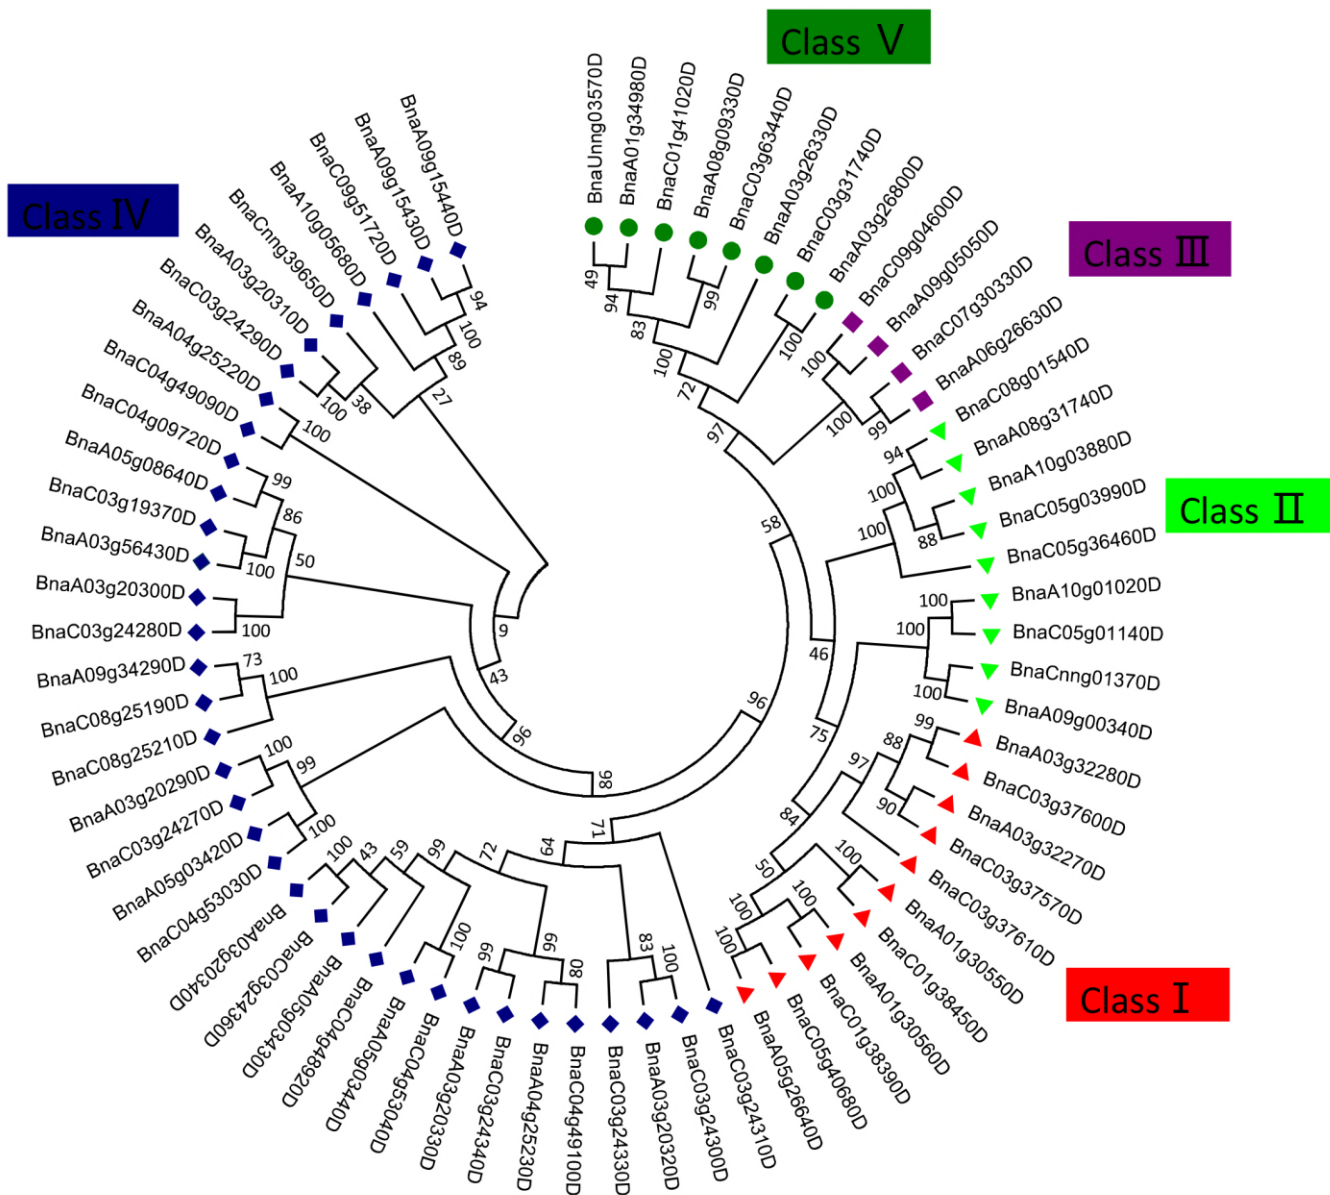

89  
 90 **Figure 1 Phylogenetic tree of the chitinase gene family in *Brassica napus*.** The chitinase protein sequences were used to construct  
 91 multiple sequence alignments using MUSCLE program within MEGA 7.0 software. Phylogenetic analysis was performed using  
 92 MEGA 7.0 with the neighbor-joining method with 1,000 bootstrap replications.

93 2.2 Conserved motifs and gene structures of the chitinase gene family in *B. napus*

94 The above phylogenetic tree highlighted that the 68 chitinase genes could be divided into five well-supported subfamilies, which  
 95 were consistent with Class I, II, III, IV, and V. As expected, the chitinase genes of Glyco\_hydro\_19 and Glyco\_hydro\_18 families  
 96 were clustered into two relatively distinct branches. Chitinase genes from subfamilies Class III and Class V are in the Glyco\_hydro\_18  
 97 clade, whereas subfamilies Class I, II, and IV that belong to Glyco\_hydro\_19 clade were clustered together and showed close  
 98 relationships (Figure 2). According to the phylogenetic tree, chitinases in different subfamilies had various characteristics. Among the  
 99 five subfamilies, Class IV was found to be the biggest group with 36 members, accounting for almost a half of the chitinase gene  
 100 family, whereas there were 11, 9, 4, 8 chitinase genes in Class I, II, III, V subfamilies, respectively.

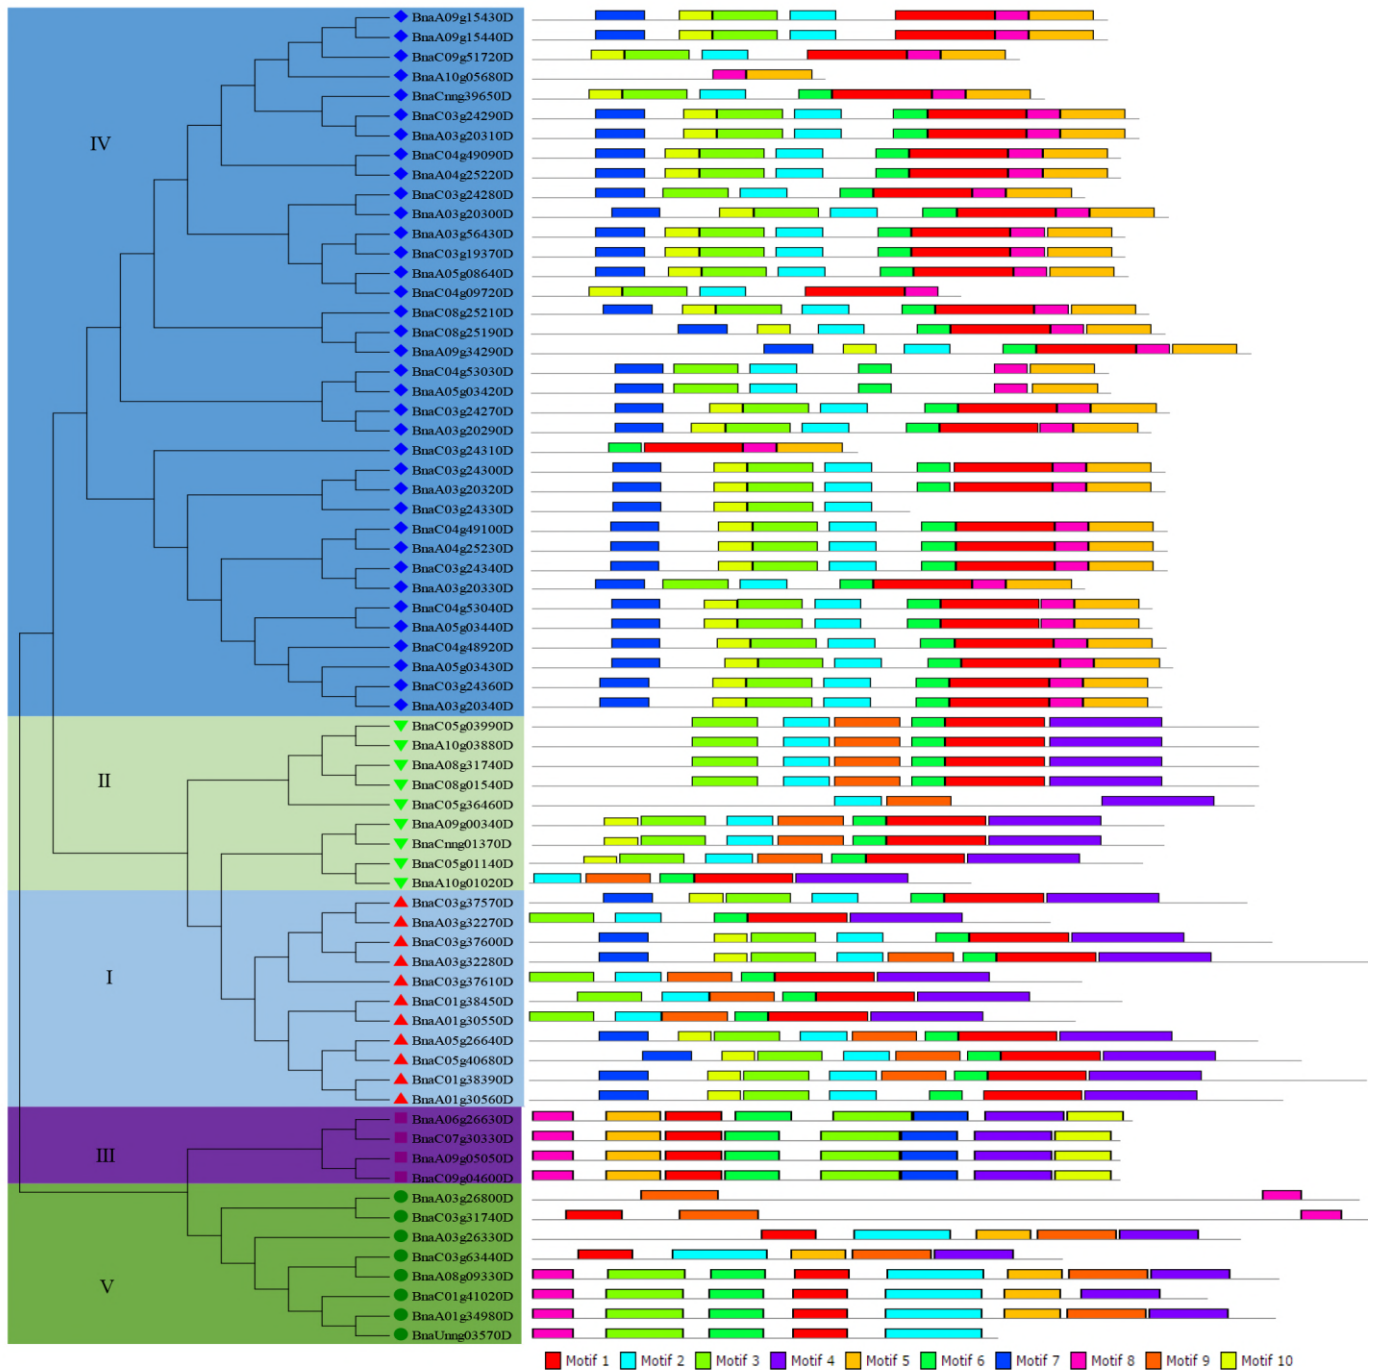

**Figure 2 Phylogenetic relationships and motif compositions of chitinase genes.** The phylogenetic tree was created in MEGA7.0 software. Five major phylogenetic groups designated as I to V were marked with different color backgrounds. Schematic representation of the conserved motifs of the chitinase gene family was elucidated by MEME software. Each motif was represented by a colored box numbered in the bottom. The details of individual motif were shown in Supplementary Figure 1 and 2.

To gain further insights into the structural diversity and functional evolution of chitinase genes, 10 motifs of all 68 chitinase genes are captured by MEME software and displayed schematically in Figure 2 and Supplementary Figure 1 and 2. As shown in Figure 2, most chitinases in the same class shared common motif compositions. Among the GH-19 family, motifs 1,3,4,9 were annotated as glycoside hydrolase catalytic domain and motif 7 was annotated as chitin-binding domain. Each member of chitinases in classes I, II and IV had at least one glycoside hydrolase catalytic domain and motif 4 was only detected in classes I and II. Most chitinase genes from subfamilies I and IV also harbored a chitin-binding domain whereas motif 7 did not exist in the subfamily II. In the GH-18 family, except for motif 8 and 9, other 8 motifs were annotated as glycoside hydrolase catalytic domains. Similarly, in the GH-19, at least one glycoside hydrolase catalytic domain was detected in every chitinase gene of class III and V. Interestingly, motif 7 and motif

115 10 are unique in class III whereas motif 2 can be only detected in class V. In addition, we analyzed the coding sequences with  
 116 corresponding genome sequences of each chitinase genes in *B. napus*. A detailed illustration of the chitinase gene structure was shown  
 117 in Figure 3. Most chitinase genes contained two or three exons, whereas three chitinase genes (BnaA01g30550D, BnaA0626330D and  
 118 BnaUnng03570D) had no introns. In general, most chitinase genes in the same class showed similar conserved motifs and exon-intron  
 119 structures. These findings revealed that motif compositions and gene structures of each class in the chitinase gene family were  
 120 relatively conserved. The similar features of chitinase genes in the same class may fulfill similar functions and this claim need to be  
 121 supported by their expression and related data.

122

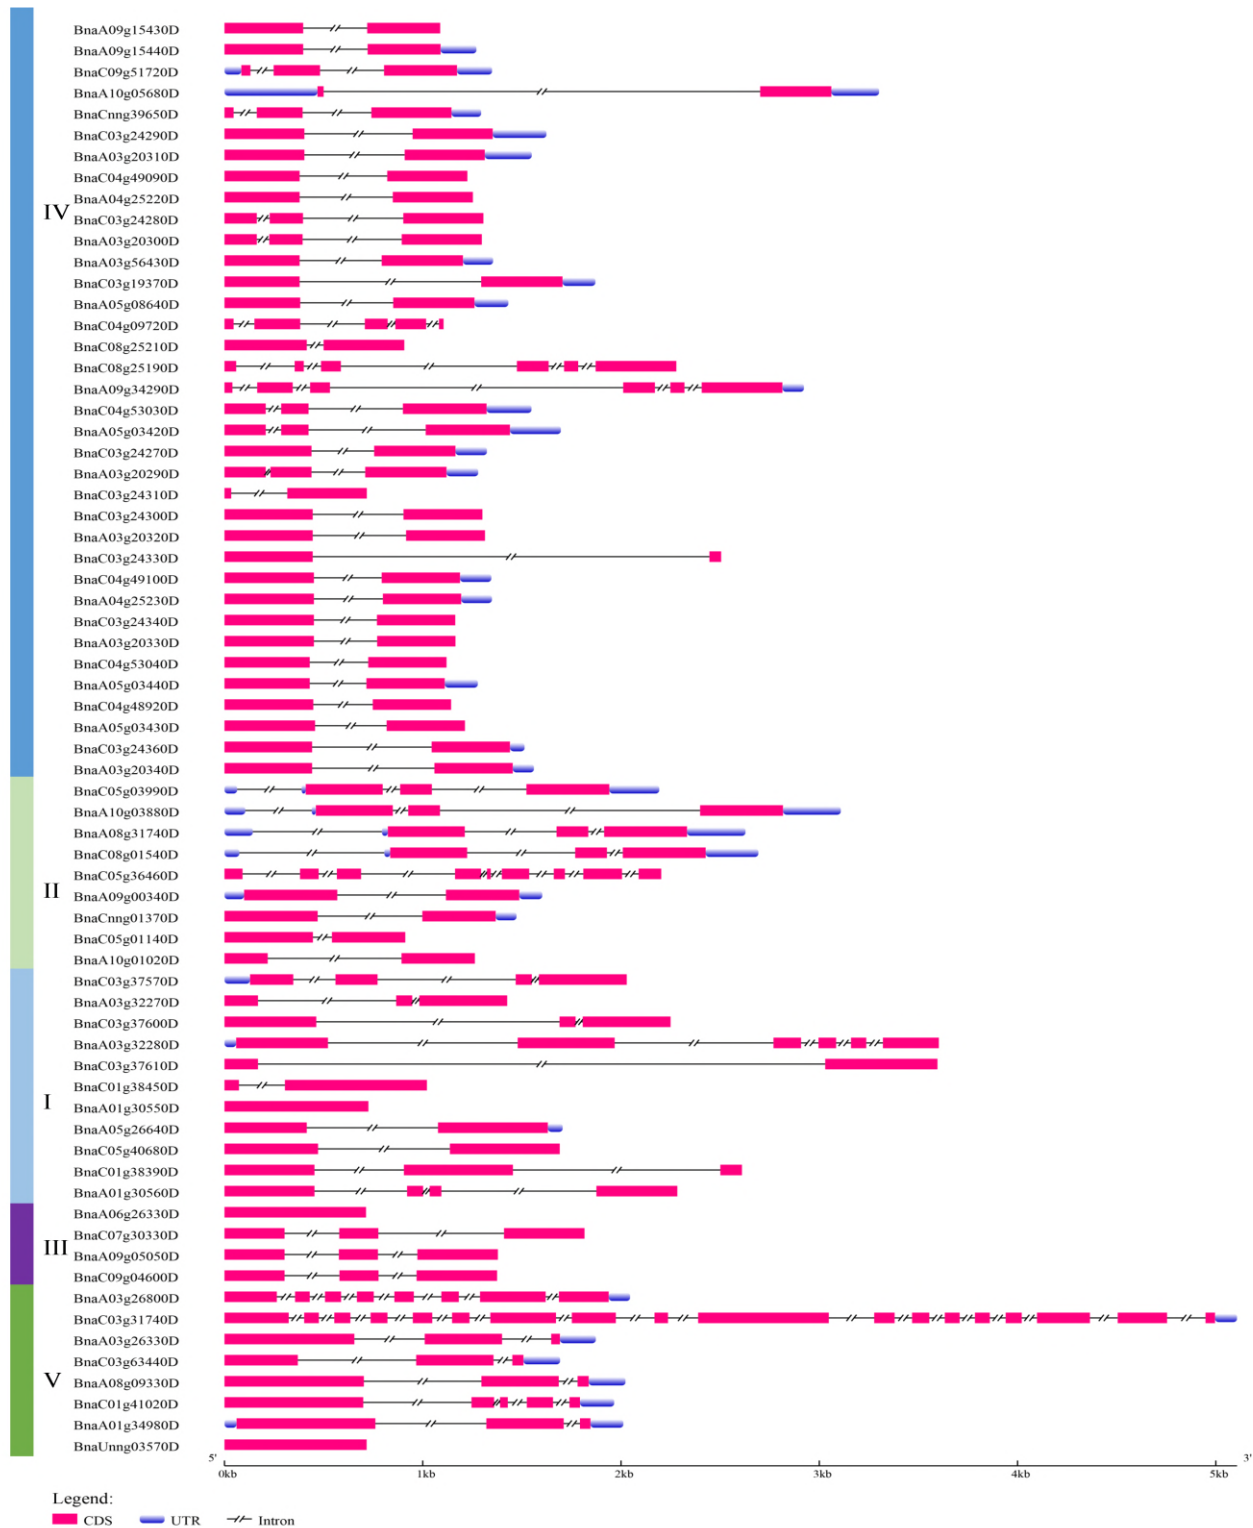

123

124 **Figure 3 Exon-intron structures of all chitinase genes in *Brassica napus*.** Schematic diagram represents the gene structure of all 68  
 125 chitinase genes identified in this study using Gene Structure Display Server (<http://gsds.cbi.pku.edu.cn/>). CDS are shown as red boxes;  
 126 introns are indicated by double slashes on the bar; UTR sequences are shown as blue boxes.

127 2.3 Chromosomal distribution and evolution patterns of chitinase genes in *B. napus*

128 The chromosomal distribution of 68 chitinase genes was analyzed based on the available gene annotation and genome sequence  
 129 assembly. The results revealed that all 68 chitinase genes were distributed among 15 out of 19 chromosomes with the exception of  
 130 chromosomes A02, A07, C02 and C06 in the *B. napus* genome (Figure 4a). There were 32 genes mapped in the A genome, and 35  
 131 genes located in the C genome while one gene BnaUnng03570D was not assigned to a chromosome. GH-19 family presented on 13  
 132 chromosomes except chromosomes A06 and C07 while GH-18 family were absent from chromosomes A04, A05, A10, C04, C05,  
 133 C08. The number of chitinase genes varied considerably among different chromosomes and the large numbers of chitinase genes were  
 134 found on chromosomes A03 and C03, harbouring 11 and 14 genes, respectively (Figure 4a). Furthermore, the classes of the chitinase  
 135 gene family were distributed in different chromosomes and up to four classes in A03 and C03 chromosomes were identified (Figure  
 136 4b).

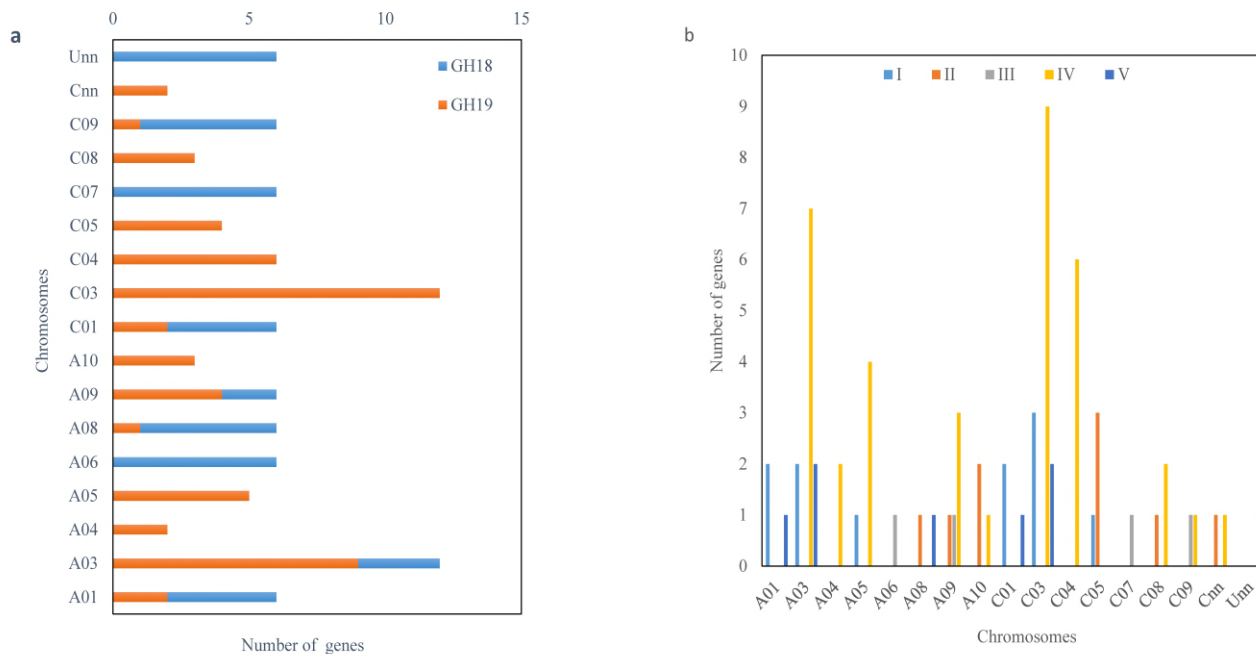

137 **Figure 4 Distribution of the chitinase gene family on *Brassica napus* chromosomes** (a) Gene distribution of GH-18 family and  
 138 GH-19 family on *Brassica napus* chromosomes. (b) Distribution of five subfamilies of chitinase genes on *Brassica napus*  
 139 chromosomes. (c) Distribution of five subfamilies of chitinase genes on *Brassica napus* chromosomes.

140 To understand the evolution of the chitinase gene family, twenty-six pairs of paralogs were detected in 68 chitinase genes based  
 141 on criteria for both coverage  $\geq 70\%$  and identity  $\geq 70\%$  (Table 2). The phylogenetic relationship analysis of chitinase genes also  
 142 showed that most pairs of paralogs could be clustered together (Figure 1). For example, the four members in two pairs of paralogs  
 143 (BnaA09g05050D and BnaC09g04600D, BnaA06g26630D and BnaC07g30330D) in Class III subfamily were clustered into two parts  
 144 in a single clade. As genome duplication was considered, one member in the A subgenome would correspond to one homologous gene  
 145 in the C subgenome in *B. napus*. In fact, 50 members of 68 chitinase genes showed such a one-to-one correspondence.  
 146 Table 2 Table listing the chitinase genes/paralog sets among A and C subgenomes of *B. napus* and their orthologs in *A. thaliana*,  
 147 *B. rapa*, *B. oleracea*.



| <i>B.napus_C</i> vs<br><i>A. thaliana</i> | <i>B.napus_A</i> vs <i>A.</i><br><i>thaliana</i> | <i>B.napus_C</i> vs<br><i>B.oleracea</i> | <i>B.napus_A</i> vs<br><i>B.rapa</i> | <i>B.napus_A</i> | <i>B.napus_C</i> |
|-------------------------------------------|--------------------------------------------------|------------------------------------------|--------------------------------------|------------------|------------------|
|                                           |                                                  |                                          |                                      | BnaA03g32270D    | BnaC03g37570D    |
| AT2G43610.1                               | AT2G43610.1                                      | Bo3g036710.1                             | Bra000314.1                          | BnaA03g20330D    | BnaC03g24340D    |
| AT2G43620.1                               | AT2G43620.1                                      | Bo3g036730.1                             | Bra000315.1                          | BnaA03g20340D    | BnaC03g24360D    |
| AT2G43590.1                               | AT2G43590.1                                      | Bo3g036660.1                             | Bra000311.1                          | BnaA03g20310D    | BnaC03g24290D    |
|                                           |                                                  |                                          | Bra027940.1                          | BnaA09g15430D    | BnaA09g15440D    |
|                                           |                                                  |                                          | Bra027940.1                          | BnaA09g15440D    | BnaA09g15430D    |
| AT4G01700.1                               | AT4G01700.1                                      | Bo9g004220.1                             | Bra036316.1                          | BnaA09g00340D    | BnaCnng01370D    |
| AT4G19810.1                               | AT4G19810.1                                      | Bo1g021980.1                             | Bra020951.1                          | BnaA08g09330D    | BnaC03g63440D    |
| AT5G24090.1                               | AT5G24090.1                                      | Bo9g013820.1                             | Bra026469.1                          | BnaA09g05050D    | BnaC09g04600D    |
|                                           |                                                  | Bo3g036670.1                             | Bra000312.1                          | BnaA03g20320D    | BnaC03g24300D    |
|                                           |                                                  | Bo3g028270.1                             | Bra023009.1                          | BnaA03g56430D    | BnaC03g19370D    |
| AT3G12500.1                               | AT3G12500.1                                      | Bo5g133420.1                             | Bra034754.1                          | BnaA05g26640D    | BnaC05g40680D    |
| AT2G43580.1                               | AT2G43580.1                                      | Bo3g036650.1                             | Bra000311.1                          | BnaA03g20300D    | BnaC03g24280D    |
|                                           | AT2G43590.1                                      | Bo4g194450.1                             | Bra037699.1                          | BnaA04g25220D    | BnaC04g49090D    |
|                                           |                                                  | Bo5g003080.1                             | Bra033318.1                          | BnaA10g01020D    | BnaC05g01140D    |
|                                           |                                                  | Bo4g020930.1                             | Bra004773.1                          | BnaA05g03440D    | BnaC04g53040D    |
|                                           |                                                  | Bo1g139190.1                             | Bra038727.1                          | BnaA01g30550D    | BnaC01g38450D    |
| AT2G43610.1                               | AT2G43610.1                                      | Bo4g194460.1                             | Bra037698.1                          | BnaA04g25230D    | BnaC04g49100D    |
| AT2G43570.1                               | AT2G43570.1                                      | Bo3g036640.1                             | Bra000310.1                          | BnaA03g20290D    | BnaC03g24270D    |
| AT5G24090.1                               | AT5G24090.1                                      | Bo7g097210.1                             | Bra009731.1                          | BnaA06g26630D    | BnaC07g30330D    |
| AT1G05850.1                               | AT1G05850.1                                      | Bo8g005830.1                             | Bra030628.1                          | BnaA08g31740D    | BnaC08g01540D    |
| AT4G19810.1                               | AT4G19810.1                                      | Bo1g021960.1                             | Bra013426.1                          | BnaA01g34980D    | BnaC01g41020D    |
|                                           |                                                  | Bo8g083650.1                             |                                      | BnaA09g34290D    | BnaC08g25190D    |
| AT1G05850.1                               | AT1G05850.1                                      | Bo5g007040.1                             | Bra015457.1                          | BnaA10g03880D    | BnaC05g03990D    |
|                                           | AT3G12500.1                                      | Bo1g139210.1                             | Bra038726.1                          | BnaA01g30560D    | BnaC01g38390D    |
| AT2G43570.1                               |                                                  | Bo4g020920.1                             | Bra004771.1                          | BnaA05g03420D    | BnaC04g53030D    |
| AT2G43620.1                               | AT2G43620.1                                      | Bo3g036730.1                             | Bra004772.1                          | BnaA05g03430D    | BnaC04g48920D    |
|                                           | AT4G19750.1                                      |                                          | Bra000892.1                          | BnaA03g26330D    |                  |
|                                           | AT4G01040.1                                      |                                          | Bra000939.1                          | BnaA03g26800D    |                  |
|                                           |                                                  |                                          | Bra001454.1                          | BnaA03g32280D    |                  |
|                                           | AT2G43590.1                                      |                                          | Bra005345.1                          | BnaA05g08640D    |                  |
|                                           |                                                  |                                          | Bra039597.1                          | BnaA10g05680D    |                  |
| AT2G43590.1                               |                                                  | Bo3g024590.1                             |                                      |                  | BnaCnng39650D    |
|                                           |                                                  | Bo9g055720.1                             |                                      |                  | BnaC09g51720D    |
| AT3G54420.1                               |                                                  | Bo8g083670.1                             |                                      |                  | BnaC08g25210D    |
|                                           |                                                  | Bo5g123590.1                             |                                      |                  | BnaC05g36460D    |
|                                           |                                                  |                                          |                                      |                  | BnaC04g09720D    |
|                                           |                                                  | Bo3g064970.1                             |                                      |                  | BnaC03g37610D    |
|                                           |                                                  |                                          |                                      |                  | BnaC03g37600D    |
|                                           |                                                  | Bo3g054420.1                             |                                      |                  | BnaC03g31740D    |
|                                           |                                                  | Bo3g036700.1                             |                                      |                  | BnaC03g24330D    |
| AT2G43600.1                               |                                                  | Bo3g036680.1                             |                                      |                  | BnaC03g24310D    |
| AT4G19810.1                               |                                                  | Bo1g021980.1                             | Bra020951.1                          |                  | BnaUnng03570D    |

149

150

151

The distribution of chitinase genes indicated a relatively deep evolutionary origin of these chitinase genes as well as gene duplication. Previous research suggests that the evolution of a plant disease resistance gene family is usually mediated by

152 recombination, tandem duplication, and segmental duplication (LEISTER 2004). The allotetraploid *B. napus* is a spontaneous  
153 hybridisation of *B. rapa* (A genome) and *B. oleracea* (C genome). To understand the origin and duplication patterns of these  
154 chitinase genes, putative orthologs of chitinase genes in *B. napus* were also identified in *A. thaliana*, *B. rapa* and *B. oleracea* (Table  
155 2). The results demonstrated that 30 orthologs of 32 chitinase genes in the A subgenome were identified in *B. rapa* and 32 orthologs of  
156 35 chitinase genes in the C subgenome in *B. oleracea*. The gene BnaUnng03570D had both orthologs (Bo1g021980.1 and  
157 Bra020951.1) in *B. rapa* and *B. oleracea*, respectively, but it had much higher identities with Bo1g021980.1. Furthermore, the order  
158 and synteny of chitinase genes BnaA03g20290D, BnaA03g20300D, BnaA03g20310D, BnaA03g20320D, BnaA03g20330D,  
159 BnaA03g20340D in chromosome A03 and BnaC03g24270D, BnaC03g24280D, BnaC03g24290D, BnaC03g24300D,  
160 BnaC03g24340D, BnaC03g24360D in chromosome C03, as well as those genes for both subgenomes of the allopolyploid (the A and  
161 C subgenomes in *B. napus* vs. the A and C genomes in *B. rapa* and *B. oleracea*) revealed that there were a few structural  
162 rearrangements and genomic collinearity in *B. napus* with regard to the chitinase gene family evolution and expansion. These findings  
163 showed that most chitinase genes (63/68) of allotetraploid *B. napus* were inherited from their diploid ancestors by recombination or  
164 segmental duplication. It is interesting to observe that the best hit of chitinase gene BnaA09g15430D was BnaA09g15440D which  
165 were tandem repeats on the A09 chromosome. It was also observed that five chitinase genes in *B. napus* had no orthologs in their  
166 diploid ancestors. Of these, three genes (BnaA09g34290D, BnaC04g09720D and BnaC03g37600D) and one paralog of two genes  
167 (BnaA03g32270D and BnaC03g37570D) did not have orthologs in *A. thaliana*, *B. rapa* and *B. oleracea*, which might result from  
168 incomplete and error-filled genome assemblies and gene annotation errors or gene structure rearrangement in the evolutionary process.  
169 Perhaps these five genes might be the new members of the chitinase gene family during the evolution in *B. napus*.

#### 170 2.4 Transcriptomic profiles of the chitinase gene family in response to *L. maculans* and *S. sclerotiorum* during early infection in *B.* 171 *napus*

172 Blackleg, also known as stem canker caused by *L. maculans* and sclerotinia stem rot caused by *S. sclerotiorum* are two major  
173 rapeseed diseases in most major rapeseed growing areas. The expression profiling of all chitinase genes in response to *L. maculans*  
174 and *S. sclerotiorum* infection in resistant and susceptible *B. napus* accessions were investigated using whole-transcriptome sequencing  
175 data to understand the roles of chitinase genes at early stages of infection. The results showed that these two biostresses caused a  
176 significant expression induction of some members in the chitinase gene family. The differentially expressed genes (DEGs) of  
177 chitinases in response to *L. maculans* were identified. Among all 68 chitinase genes in the genome, 31 and 25 chitinase genes were up-  
178 regulated in the resistant lines and susceptible lines inoculated with the pathogen compared with their water control, respectively. Of  
179 these up-regulated chitinase genes, 24 were overlapped in the resistant lines and susceptible accessions. Combined data of all resistant  
180 and susceptible lines revealed that 15 chitinase genes were upregulated and no chitinase gene was dramatically downregulated during  
181 the infection of pathogen *L. maculans* (Figure 5).

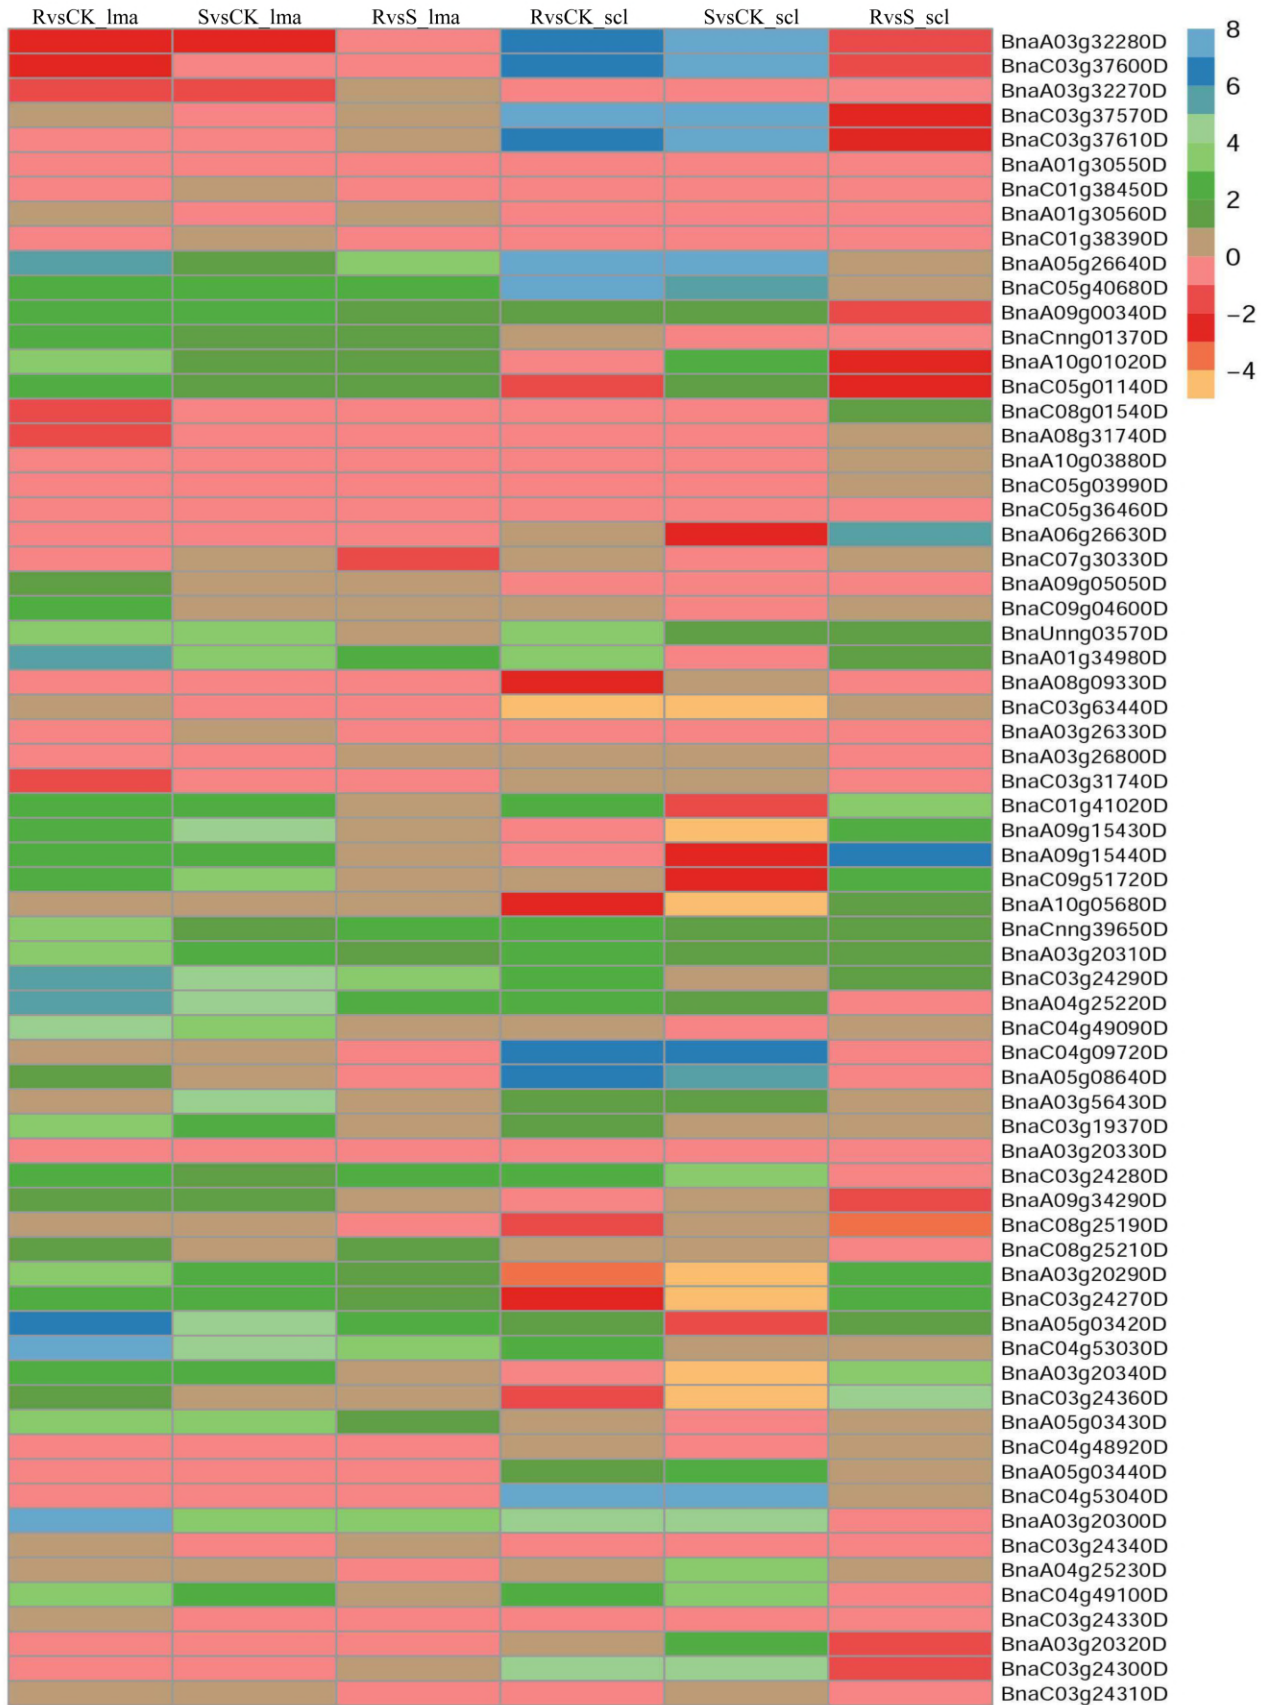

182

183

184

185

186

**Figure 5** Expression profiles of chitinase genes in response to *Leptosphaeria maculans* (lma) and *Sclerotinia sclerotiorum* (scl) infection. Relative fold change in as compared to control in resistant and susceptible *B. napus* lines and was used to generate heatmap. R and S were represented as resistant and susceptible lines, respectively. The colored scale for the relative expression levels is shown.

187 In a previous report, the abundance of transcripts in resistant and susceptible *B. napus* accessions at the 4 day post-inoculation  
 188 treatments were analyzed to understand the differential defense response to *S. sclerotiorum* (WU *et al.* 2016). Using these data and all  
 189 68 chitinase genes identified in this study, 23 and 20 chitinase genes were up-regulated while 6 and 11 members were downregulated  
 190 in the resistant accession and susceptible accession compared with water control, respectively. Compared with the expression of  
 191 chitinase genes in response to blackleg pathogen infection, 16 up-regulated and 4 down-regulated chitinase genes were overlapped  
 192 respectively. Compared with the S accession, the analyses showed that 13 and 7 chitinase genes were the same as those upregulated  
 193 and downregulated ones against *S. sclerotiorum* attack, respectively.

194 Chitinase genes which were induced after infection with *L. maculans* and *S. sclerotiorum* in rapeseed were further classified into  
 195 three groups (Table 3). In the first group, 10 members of the chitinase gene family had stronger up-regulation in resistant accessions  
 196 than susceptible counterparts with more than two values of log<sub>2</sub>. These 10 chitinase genes showed a wide range of upregulation in  
 197 resistant accession infected by *S. sclerotiorum* and the differences of the upregulation between resistant and susceptible accessions  
 198 varied and were less than two in the log<sub>2</sub> values. There were 9 chitinase genes showing higher upregulation in the infection of  
 199 resistant accessions with *L. maculans* with the log<sub>2</sub> values of more than three while most of these genes were less upregulated in  
 200 susceptible accessions. In the infection of *S. sclerotiorum*, only few chitinase genes in the second group showed upregulated. Eight  
 201 members of chitinase genes in the third group showed very high levels of upregulation with the log<sub>2</sub> values ranging from 4.45-7.96 in  
 202 the infection of *S. sclerotiorum* while the differences in both resistant and susceptible accessions were little or even higher in  
 203 susceptible accessions. The chitinase genes in the third group showed much less variation in the infection of *L. maculans* and the  
 204 expression of some of these genes were not detected, indicating that these genes did not play a critical role in the defense against *L.*  
 205 *maculans*. The results suggested that the cross-talk under different pathogen attack and redundant functions can be maintained over  
 206 long evolutionary periods. On the other hand, eight chitinase genes were preferentially induced by *L. maculans* infection while other 8  
 207 chitinase genes were preferentially increased by *S. sclerotiorum* infection respectively. The distinctive expression pattern of the  
 208 chitinase gene family suggested that the functions of different members in the chitinase gene family have diverged during long-term  
 209 evolution and might exhibit different roles against different biotic and abiotic stresses.

210 Table 3 Fold change (log<sub>2</sub>) of chitinase gene expression in response to *Leptosphaeria maculans* (lma) and *Sclerotinia*  
 211 *sclerotiorum* (scl) infection in resistant and susceptible *B. napus* lines.

| Group | Gene          | R/CK_lma | S/CK_lma | R/S_lma | R/CK_scl | S/CK_scl | R/S_scl |
|-------|---------------|----------|----------|---------|----------|----------|---------|
| 1     | BnaA05g26640D | 5.72     | 1.71     | 3.9     | 7.68     | 7.29     | 0.39    |
|       | BnaC04g53030D | 7.99     | 4.26     | 3.83    | 2.6      | 0.87     | 0.82    |
|       | BnaA03g20300D | 7.06     | 3.76     | 3.63    | 4.1      | 4.19     | -0.48   |
|       | BnaC03g24290D | 5.94     | 4.03     | 3.51    | 2.4      | 0.81     | 1.8     |
|       | BnaA05g03420D | 6.45     | 4.33     | 2.88    | 1.09     | -1.11    | 1.12    |
|       | BnaC05g40680D | 2.05     | 2.78     | 2.62    | 7.1      | 5.97     | 0       |
|       | BnaA01g34980D | 5.64     | 3.17     | 2.43    | 3.08     | -0.41    | 1.78    |
|       | BnaCnng39650D | 3.29     | 1.16     | 2.17    | 2.1      | 1.04     | 1.85    |
|       | BnaA04g25220D | 5.96     | 4.2      | 2.15    | 2.08     | 1.85     | -0.19   |
|       | BnaC03g24280D | 2.51     | 1.36     | 2.08    | 2.88     | 3.21     | -0.29   |
| 2     | BnaC04g49090D | 4.24     | 3.64     | 0.88    | 0.41     | 0        | 0.18    |
|       | BnaA05g03430D | 3.93     | 3.21     | 1.82    | 0.12     | -0.7     | 0.33    |
|       | BnaC04g49100D | 3.69     | 2.08     | 0.87    | 2.13     | 3.71     | -0.87   |
|       | BnaA10g01020D | 3.64     | 1.66     | 1.3     | -0.59    | 2.65     | -2.82   |
|       | BnaA03g20290D | 3.38     | 2.61     | 1.95    | -3.54    | -4.95    | 2.49    |
|       | BnaC03g19370D | 3.16     | 2.23     | 0.61    | 1.25     | 0.93     | 0.2     |

|   |               |       |       |       |      |      |       |
|---|---------------|-------|-------|-------|------|------|-------|
|   | BnaUnng03570D | 3.15  | 3.2   | 0.63  | 3.66 | 1.97 | 1.16  |
|   | BnaA03g20310D | 3.01  | 2.55  | 1.74  | 2.27 | 1    | 1.22  |
|   | BnaC04g53040D | 0     | 0     | 0     | 7.69 | 7.47 | 0.29  |
|   | BnaC03g37570D | 0.01  | -0.63 | 0.34  | 7.33 | 7.96 | -2.73 |
|   | BnaC03g37610D | -0.21 | -0.88 | 0.51  | 6.78 | 7.1  | -2.75 |
| 3 | BnaA03g32280D | -2.61 | -2.03 | -0.74 | 6.71 | 7.07 | -1.68 |
|   | BnaC03g37600D | -2.3  | -0.81 | -0.54 | 6.62 | 7.26 | -1.18 |
|   | BnaC04g09720D | 0.3   | 0.75  | -0.3  | 6.51 | 6.19 | -0.84 |
|   | BnaA05g08640D | 1.97  | 0.72  | -0.25 | 6.27 | 5.62 | -0.72 |
|   | BnaC03g24300D | -0.09 | 0     | 0.06  | 4.5  | 4.45 | -1.5  |

### 3. Discussion

Plants have developed highly sophisticated immune mechanisms to respond to pathogen attack by the induction of expression of a large number of genes encoding pathogenesis-related (PR) proteins, such as chitinases. Chitinases are believed to play important roles in plant-pathogen interactions and catalyze the hydrolysis of the  $\beta$ -1-4-linkage in the N-acetyl-D-glucosamine polymer of chitin, which is a major component of many fungal cell walls, but absent in higher plants (LEGRAND *et al.* 1987; COLLINGE *et al.* 1993). The chitinase gene family has been widely characterized as excellent candidates to improve plants tolerance to stresses, including drought (HONG and HWANG 2002; LEE *et al.* 2008), salt (HONG and HWANG 2002), cold (YEH *et al.* 2000), heat (KWON *et al.* 2007), UV light, wounding (BREDERODE *et al.* 1991), fungal pathogens and some insect pests (LIN *et al.* 1995; DING *et al.* 1998; YAMAMOTO *et al.* 2000; WANG *et al.* 2005; PRASAD *et al.* 2013; CHEN *et al.* 2014). However, the genome-wide identification and expression pattern of the chitinase gene family in response to *L. maculans* and *S. sclerotiorum* infection has not been reported in *B. napus*.

In this study, a total of 68 chitinase genes were identified in *B. napus* genome. Of these, GH-18 family and GH-19 family have 12 and 56 chitinase genes, respectively, which was further supported by analysis of gene structure and conserved motifs (Figure 2, 3). GH-18 family was divided into Class III (4 genes) and Class V (8 genes). GH-19 family was composed of Class I (11 genes), Class II (9 genes) and Class IV (36 genes). However, there were 13 and 26 chitinase genes in GH-19 family and GH-18 family in para rubber tree, respectively (MISRA 2015). Class IV had the most members in *B. napus* whereas Class III posed the most genes of chitinase in Para rubber tree, which may reveal that there is evolutionary divergence of specific classes of chitinases in different species. The chitinase gene family has 24, 32, 35, and 68 members in *A. thaliana*, *B. rapa*, *B. oleracea*, and *B. napus*, respectively (XU *et al.* 2007), which suggested that chitinase genes in *B. napus* had expanded in comparison to its ancestors. Gene duplication events, such as tandem duplication and segmental duplication play important roles in the rapid expansion and evolution of gene families (XU *et al.* 2012). The AACC genome of *B. napus* was formed through recent allopolyploidy between the ancestors of *B. rapa* (AA) and *B. oleracea* (CC) (CHALHOUB *et al.* 2014). From our analysis, 30 orthologs of 32 chitinase genes in the A genome were identified in *B. rapa* and 32 orthologs of 35 chitinase genes in the C genome of *B. oleracea*. Most orthologous gene pairs in *B. rapa* and *B. oleracea* are still homeologous pairs in *B. napus*. Most chitinase genes in *B. napus* showed a close relationship to their ancestor chitinase genes, which suggested that segmental duplication or polyploidy events contributed to the expansion of the chitinase gene family in *B. napus*. Only one pair of tandemly duplicated genes (BnaA09g15430D and BnaA09g15440D) was identified. These findings suggest that segmental duplication and tandem duplication likely plays an important role in the expansion of the chitinase gene family in *B. napus*. Moreover, five genes (BnaA09g34290D, BnaC04g09720D, BnaC03g37600D, BnaA03g32270D and BnaC03g37570D) do not have orthologs in *A. thaliana*, *B. rapa* and *B. oleracea*, suggesting that they may be the new members of the chitinase gene family and coevolve with fungi in response to variation in pathogen defenses.

Chitinases play a major role in host defense by directly attacking fungal pathogens in *A. thaliana* (GERHARDT *et al.* 1997), rice (LIN *et al.* 1995), grapevine (YAMAMOTO *et al.* 2000), tobacco (DING *et al.* 1998; CHEN *et al.* 2014; DONG *et al.* 2017), peanut

(PRASAD *et al.* 2013) and pepper (HONG and HWANG 2002). Some chitinase members can be induced by fungal pathogens, such as *Cylindrosporium concentricum*, *Phoma lingam*, and *S. sclerotiorum*. The role of chitinase gene also had been studied in *B. napus* and overexpression of chitinase genes could increase tolerance in transgenic plants previously (GRISON *et al.* 1996; ZARINPANJEH *et al.* 2016). Transgenic plants of *B. napus* cv. ZS 758 carrying sporamin and chitinase PjChi-1 genes exhibited increased levels of resistance to *S. sclerotiorum* and reduced the size of leaf spot in transformants compared to untransformed wild-type plants (LIU *et al.* 2011). However, constitutive expression of pea chitinase gene showed little or no enhancement of resistance to *L. maculans* in transgenic rapeseed compared with non-expressing transgenic lines (WANG *et al.* 1999). Some chitinases such as pineapple leaf chitinase-A do not have any antifungal activity (TAIRA *et al.* 2005). Although many studies about the individual member of the chitinase gene family have been published, there is little information about analysis of their expression divergence of the chitinase gene family at a genome-wide level in rapeseed, especially under different fungal pathogen stresses. In this study, detailed expression pattern of the chitinase gene family against *L. maculans* and *S. sclerotiorum* infection in rapeseed was analyzed using RNA-seq data. The results showed that many chitinase genes could transcriptionally respond to *L. maculans* and *S. sclerotiorum* infection in rapeseed (Figure 5), implying possible function of chitinase genes in response to these two fungal pathogens in *B. napus*. The results reveal that the resistant accessions differentiate from the susceptible ones in pathogen defense so we hypothesized that the function of different chitinase genes has been diverged against pathogens in resistant and susceptible *B. napus* accessions. Previously, the expression of chitinase genes could be induced in response to all kinds of pathogens, such as *G. mosseae*, *F. subglutinans* f. sp. *Pini*, *X. campestris*, *L. maculans* and *S. sclerotiorum* (GERHARDT *et al.* 1997; BONANOMI *et al.* 2001; DAVIS *et al.* 2002; LOWE *et al.* 2014; WU *et al.* 2016). Next, to identify genes critically responsible for *L. maculans* and *S. sclerotiorum* resistance in resistant accessions, we compared the *L. maculans* and *S. sclerotiorum* responsive chitinase genes in both resistant and susceptible accessions, respectively. Furthermore, we compared the 18 up-regulated chitinase genes on pathogen *L. maculans* aggression with 18 up-regulated chitinase genes against *S. sclerotiorum* attack. Interestingly, the upregulation after infection with *L. maculans* was stronger in resistant accession than in susceptible accessions. In contrast, the upregulation after *S. sclerotiorum* attack showed higher levels in both resistant and susceptible accessions whereas there was much less differences in in both resistant and susceptible accessions. In addition, there were some chitinase members that no expression changes was detected, which may be accounted for that some chitinases showed little or no enhancement of resistance and do not have any antifungal activity (WANG *et al.* 1999; TAIRA *et al.* 2005). The above results indicate that some members of the chitinase gene family have developed as powerful basal defence against various pathogens attack and other individual members of the chitinase gene family have evolved different roles in response to different environmental stresses in *B. napus*.

In summary, our study provides a comprehensive analysis of the chitinase gene family in the rapeseed, including gene identification, sequence features, physical location, evolutionary relationship, and expression patterns of chitinase genes responding to *L. maculans* and *S. sclerotiorum* infection, which could facilitate further dissection of the function of the chitinase gene family in rapeseed.

## 4. Materials and Methods

### 4.1 Identification of chitinase genes in *B. napus*

The v4.1 genome sequences and annotations of *B. napus* were downloaded from the FTP site of the Brassica database ([ftp://brassicadb.org/Brassica\\_napus/](ftp://brassicadb.org/Brassica_napus/))(CHENG *et al.* 2011). To identify chitinase genes in *B. napus*, Glyco\_hydro\_18 (PF00704) and Glyco\_hydro\_19 (PF00182) domains were obtained from the Pfam website (<http://pfam.xfam.org/>). The HMMER software version 3.0 was employed to identify chitinase genes against all known protein sequences (FINN *et al.* 2011). All candidate genes were further submitted to Pfam analysis (<http://pfam.xfam.org/>) to confirm the presence of one of the above two domains with E-value 0.0001. For annotation, the identified protein sequences were aligned with NCBI nr database using BLAST alignment (E-value cut-off of 1e-5)

(ALTSCHUL *et al.* 1997). The identification of signal peptide was performed in the website (<http://www.cbs.dtu.dk/services/SignalP/>) (PETERSEN *et al.* 2011).

#### 4.2 Phylogenetic tree construction, and sequence analysis

All identified chitinase genes were aligned using the MUSCLE program within MEGA 7.0 software (KUMAR *et al.* 2016). Subsequently, a neighbor-joining (NJ) method was then applied to construct a phylogeny of chitinase genes with a 1000 bootstrap replication. Motifs of chitinase proteins in *B. napus* were investigated statistically using online MEME software (<http://meme-suite.org/tools/meme>), which set the maximum number of motifs at 10. Subsequently, InterProScan (<http://www.ebi.ac.uk/interpro/search/sequence-search>) was employed to annotate the all identified motifs. In addition, the exon-intron structures of genes were performed with the gene structure display server program (<http://gsds.cbi.pku.edu.cn/>).

#### 4.3 Chromosomal distribution and evolution patterns of chitinase genes

The chromosomal locations of chitinase genes were determined based on annotation data obtained from the *B. napus* database. The orthologous relationships between the chitinase genes in *B. napus* and *A. thaliana*, *B. rapa*, and *B. oleracea* genes were evaluated following the criteria: we used program BLAST to identify putative orthologues between chitinase genes in *B. napus* and one of *A. thaliana*, *B. rapa*, and *B. oleracea* species with both coverage over 70% and identity more than 70%, all chitinase sequences from *B. napus* was searched against all gene sequences from one of *A. thaliana*, *B. rapa*, and *B. oleracea* species. Tandem duplication was characterized as multiple genes of one family located within the same or neighboring intergenic region (LI *et al.* 2014).

#### 4.4 Analysis of transcriptome sequencing data

The sequence data responsive to *L. maculans* infection was deposited in the BioProject Database of the National Center for Biotechnology Information under accession number PRJNA378851. Transcriptome data under accession number PRJNA274853 publicly available on the NCBI SRA database were mined and analyzed for expression patterns of the rapeseed chitinase genes in response to *S. sclerotiorum* infection. Sequencing reads were then aligned to the *B. napus* reference genome sequence ([ftp://brassicadb.org/Brassica\\_napus/](ftp://brassicadb.org/Brassica_napus/)) using TopHat, v2.1.1 (KIM *et al.* 2013). Mapping data was used to estimate expression values for annotated genes using htseq-count tool (ANDERS *et al.* 2015). Differential gene expression analyses were performed using the R/Bioconductor package, DESeq2 (LOVE *et al.* 2014). An absolute value of log<sub>2</sub> fold change >1.5 and the False Discovery Rate (FDR) < 0.05 was set to declare differentially expressed genes.

#### Supplementary Materials

Supplementary Figure 1 Details of the ten conserved motifs of chitinase GH-18 family as derived by MEME analysis.

Supplementary Figure 2 Details of the ten conserved motifs of chitinase GH-19 family as derived by MEME analysis.

Supplementary Table 1 Amino acid sequences of 68 chitinase genes in *B. napus*.

#### Acknowledgments

This study was financially supported by the Independent Innovation Special Fund of Henan Academy of Agricultural Sciences (2018ZC78), the Henan Fundamental and Frontier Research Fund (162300410153) and by the Natural Sciences and Engineering Research Council (NSERC) CRD project and the Growing Forward project of SaskCanola and Agriculture and Agri-Food Canada (AAFC).

#### Author Contributions

319 Wen Xu and Genyi Li designed the study. Tengsheng Zhou and Bo An performed the experiments. Wen Xu and Baojiang Xu  
320 analyzed the data and drafted the manuscript. Genyi Li and Wen Xu finished the manuscript. All of the authors carefully checked and  
321 approved this version of the manuscript.

## 322 **Conflicts of Interest**

323 The authors declare no conflict of interest.

## 324 **References**

- 325 Ahmed, N. U., J. I. Park, M. S. Seo, T. S. Kumar, I. H. Lee *et al.*, 2012 Identification and expression analysis of chitinase  
326 genes related to biotic stress resistance in Brassica. *Mol Biol Rep* 39: 3649-3657.
- 327 Altschul, S. F., T. L. Madden, A. A. Schaffer, J. Zhang, Z. Zhang *et al.*, 1997 Gapped BLAST and PSI-BLAST: a new  
328 generation of protein database search programs. *Nucleic Acids Res* 25: 3389-3402.
- 329 Anders, S., P. T. Pyl and W. Huber, 2015 HTSeq--a Python framework to work with high-throughput sequencing data.  
330 *Bioinformatics* 31: 166-169.
- 331 Bekesiova, B., S. Hraska, J. Libantova, J. Moravcikova and I. Matusikova, 2008 Heavy-metal stress induced accumulation  
332 of chitinase isoforms in plants. *Molecular Biology Reports* 35: 579-588.
- 333 Bonanomi, A., A. Wiemken, T. Boller and P. Salzer, 2001 Local induction of a mycorrhiza-specific class III chitinase  
334 gene in cortical root cells of *Medicago truncatula* containing developing or mature arbuscules. *Plant Biology* 3:  
335 194-199.
- 336 Brederode, F. T., H. J. M. Linthorst and J. F. Bol, 1991 Differential Induction of Acquired-Resistance and Pr Gene-  
337 Expression in Tobacco by Virus-Infection, Ethephon Treatment, Uv-Light and Wounding. *Plant Molecular*  
338 *Biology* 17: 1117-1125.
- 339 Cantarel, B. L., P. M. Coutinho, C. Rancurel, T. Bernard, V. Lombard *et al.*, 2009 The Carbohydrate-Active EnZymes  
340 database (CAZy): an expert resource for Glycogenomics. *Nucleic Acids Research* 37: D233-D238.
- 341 Chalhoub, B., F. Denoeud, S. Liu, I. A. Parkin, H. Tang *et al.*, 2014 Plant genetics. Early allopolyploid evolution in the  
342 post-Neolithic *Brassica napus* oilseed genome. *Science* 345: 950-953.
- 343 Chen, P. J., R. Senthilkumar, W. N. Jane, Y. He, Z. Tian *et al.*, 2014 Transplastomic *Nicotiana benthamiana* plants  
344 expressing multiple defence genes encoding protease inhibitors and chitinase display broad-spectrum resistance  
345 against insects, pathogens and abiotic stresses. *Plant Biotechnol J* 12: 503-515.
- 346 Cheng, F., S. Liu, J. Wu, L. Fang, S. Sun *et al.*, 2011 BRAD, the genetics and genomics database for Brassica plants.  
347 *BMC Plant Biol* 11: 136.
- 348 Collinge, D. B., K. M. Kragh, J. D. Mikkelsen, K. K. Nielsen, U. Rasmussen *et al.*, 1993 Plant chitinases. *Plant J* 3: 31-40.
- 349 Davis, J. M., H. G. Wu, J. E. K. Cooke, J. M. Reed, K. S. Luce *et al.*, 2002 Pathogen challenge, salicylic acid, and  
350 jasmonic acid regulate expression of chitinase gene homologs in pine. *Molecular Plant-Microbe Interactions* 15:  
351 380-387.
- 352 Dejong, A. J., J. Cordewener, F. Loschiavo, M. Terzi, J. Vandekerckhove *et al.*, 1992 A Carrot Somatic Embryo Mutant  
353 Is Rescued by Chitinase. *Plant Cell* 4: 425-433.
- 354 Ding, X., B. Gopalakrishnan, L. B. Johnson, F. F. White, X. Wang *et al.*, 1998 Insect resistance of transgenic tobacco  
355 expressing an insect chitinase gene. *Transgenic Res* 7: 77-84.
- 356 Dong, X., Y. Zhao, X. Ran, L. Guo and D. G. Zhao, 2017 Overexpression of a New Chitinase Gene *EuCHIT2* Enhances  
357 Resistance to *Erysiphe cichoracearum* DC in Tobacco Plants. *Int J Mol Sci* 18.
- 358 Finn, R. D., J. Clements and S. R. Eddy, 2011 HMMER web server: interactive sequence similarity searching. *Nucleic*  
359 *Acids Res* 39: W29-37.
- 360 Gerhardt, L. B. D., G. Sabetto-Martins, M. G. Contarini, M. Sandroni, R. D. Ferreira *et al.*, 1997 *Arabidopsis thaliana*  
361 class IV chitinase is early induced during the interaction with *Xanthomonas campestris*. *Febs Letters* 419: 69-75.
- 362 Grison, R., B. Grezes-Besset, M. Schneider, N. Lucante, L. Olsen *et al.*, 1996 Field tolerance to fungal pathogens of  
363 *Brassica napus* constitutively expressing a chimeric chitinase gene. *Nat Biotechnol* 14: 643-646.
- 364 Haddadi, P., L. Ma, H. Wang and M. H. Borhan, 2016 Genome-wide transcriptomic analyses provide insights into the  
365 lifestyle transition and effector repertoire of *Leptosphaeria maculans* during the colonization of *Brassica napus*  
366 seedlings. *Mol Plant Pathol* 17: 1196-1210.
- 367 Henrissat, B., 1991 A Classification of Glycosyl Hydrolases Based on Amino-Acid-Sequence Similarities. *Biochemical*  
368 *Journal* 280: 309-316.
- 369 Hong, J. K., and B. K. Hwang, 2002 Induction by pathogen, salt and drought of a basic class II chitinase mRNA and its in  
370 situ localization in pepper (*Capsicum annuum*). *Physiologia Plantarum* 114: 549-558.



- 371 Joshi, R. K., S. Megha, M. H. Rahman, U. Basu and N. N. Kav, 2016 A global study of transcriptome dynamics in canola  
372 (*Brassica napus* L.) responsive to *Sclerotinia sclerotiorum* infection using RNA-Seq. *Gene* 590: 57-67.
- 373 Kim, D., G. Pertea, C. Trapnell, H. Pimentel, R. Kelley *et al.*, 2013 TopHat2: accurate alignment of transcriptomes in the  
374 presence of insertions, deletions and gene fusions. *Genome Biol* 14: R36.
- 375 Kumar, S., G. Stecher and K. Tamura, 2016 MEGA7: Molecular Evolutionary Genetics Analysis Version 7.0 for Bigger  
376 Datasets. *Mol Biol Evol* 33: 1870-1874.
- 377 Kwon, Y., S. H. Kim, M. S. Jung, M. S. Kim, J. E. Oh *et al.*, 2007 *Arabidopsis* hot2 encodes an endochitinase-like protein  
378 that is essential for tolerance to heat, salt and drought stresses. *Plant Journal* 49: 184-193.
- 379 Lee, B. R., W. J. Jung, B. H. Lee, J. C. Avice, A. Ourry *et al.*, 2008 Kinetics of drought-induced pathogenesis-related  
380 proteins and its physiological significance in white clover leaves. *Physiologia Plantarum* 132: 329-337.
- 381 Legrand, M., S. Kauffmann, P. Geoffroy and B. Fritig, 1987 Biological function of pathogenesis-related proteins: Four  
382 tobacco pathogenesis-related proteins are chitinases. *Proc Natl Acad Sci U S A* 84: 6750-6754.
- 383 Leister, D., 2004 Tandem and segmental gene duplication and recombination in the evolution of plant disease resistance  
384 gene. *Trends Genet* 20: 116-122.
- 385 Li, Z., H. Jiang, L. Zhou, L. Deng, Y. Lin *et al.*, 2014 Molecular evolution of the HD-ZIP I gene family in legume  
386 genomes. *Gene* 533: 218-228.
- 387 Lin, W., C. S. Anuratha, K. Datta, I. Potrykus, S. Muthukrishnan *et al.*, 1995 Genetic-Engineering of Rice for Resistance  
388 to Sheath Blight. *Bio-Technology* 13: 686-691.
- 389 Liu, H., X. Guo, M. S. Naeem, D. Liu, L. Xu *et al.*, 2011 Transgenic *Brassica napus* L. lines carrying a two gene construct  
390 demonstrate enhanced resistance against *Plutella xylostella* and *Sclerotinia sclerotiorum*. *Plant Cell, Tissue and*  
391 *Organ Culture (PCTOC)* 106: 143-151.
- 392 Love, M. I., W. Huber and S. Anders, 2014 Moderated estimation of fold change and dispersion for RNA-seq data with  
393 DESeq2. *Genome Biol* 15: 550.
- 394 Lowe, R. G., A. Cassin, J. Grandaubert, B. L. Clark, A. P. Van de Wouw *et al.*, 2014 Genomes and transcriptomes of  
395 partners in plant-fungal-interactions between canola (*Brassica napus*) and two *Leptosphaeria* species. *PLoS One* 9:  
396 e103098.
- 397 MISRA, B., 2015 Molecular Evolution and Functional Divergence of Chitinase Gene Family in *Hevea brasiliensis*  
398 Genome.
- 399 Ovtsyna, A. O., M. Schultze, I. A. Tikhonovich, H. P. Spaink, E. Kondorosi *et al.*, 2000 Nod factors of *Rhizobium*  
400 *leguminosarum* bv. *viciae* and their fucosylated derivatives stimulate a nod factor cleaving activity in pea roots  
401 and are hydrolyzed in vitro by plant chitinases at different rates. *Molecular Plant-Microbe Interactions* 13: 799-  
402 807.
- 403 Passarinho, P. A., and S. C. de Vries, 2002 *Arabidopsis* chitinases: a genomic survey. *The Arabidopsis Book*: e0023.
- 404 Petersen, T. N., S. Brunak, G. von Heijne and H. Nielsen, 2011 SignalP 4.0: discriminating signal peptides from  
405 transmembrane regions. *Nat Methods* 8: 785-786.
- 406 Prasad, K., P. Bhatnagar-Mathur, F. Waliyar and K. K. Sharma, 2013 Overexpression of a chitinase gene in transgenic  
407 peanut confers enhanced resistance to major soil borne and foliar fungal pathogens. *Journal of Plant Biochemistry*  
408 *and Biotechnology* 22: 222-233.
- 409 Punja, Z. K., and Y. Y. Zhang, 1993 Plant Chitinases and Their Roles in Resistance to Fungal Diseases. *Journal of*  
410 *Nematology* 25: 526-540.
- 411 Rasmussen, U., K. Bojsen and D. B. Collinge, 1992a Cloning and characterization of a pathogen-induced chitinase in  
412 *Brassica napus*. *Plant Mol Biol* 20: 277-287.
- 413 Rasmussen, U., H. Giese and J. D. Mikkelsen, 1992b Induction and purification of chitinase in *Brassica napus* L. ssp.  
414 *oleifera* infected with *Phoma lingam*. *Planta* 187: 328-334.
- 415 Taira, T., N. Toma and M. Ishihara, 2005 Purification, characterization, and antifungal activity of chitinases from  
416 pineapple (*Ananas comosus*) leaf. *Biosci Biotechnol Biochem* 69: 189-196.
- 417 Umemoto, N., Y. Kanda, T. Ohnuma, T. Osawa, T. Numata *et al.*, 2015 Crystal structures and inhibitor binding properties  
418 of plant class V chitinases: the cycad enzyme exhibits unique structural and functional features. *Plant J* 82: 54-66.
- 419 Wang, J. X., Z. L. Chen, J. Z. Du, Y. Sun and A. H. Liang, 2005 Novel insect resistance in *Brassica napus* developed by  
420 transformation of chitinase and scorpion toxin genes. *Plant Cell Reports* 24: 549-555.
- 421 Wang, Y., G. Nowak, D. Culley, L. A. Hadwiger and B. Fristensky, 1999 Constitutive expression of pea defense gene  
422 DRR206 confers resistance to blackleg (*Leptosphaeria maculans*) disease in transgenic canola (*Brassica napus*).  
423 *Molecular plant-microbe interactions* 12: 410-418.
- 424 West, J. S., P. Kharbanda, M. Barbetti and B. D. Fitt, 2001 Epidemiology and management of *Leptosphaeria maculans*  
425 (*phoma stem canker*) on oilseed rape in Australia, Canada and Europe. *Plant Pathology* 50: 10-27.

- 426 Woodhouse, M. R., F. Cheng, J. C. Pires, D. Lisch, M. Freeling *et al.*, 2014 Origin, inheritance, and gene regulatory  
427 consequences of genome dominance in polyploids. *Proc Natl Acad Sci U S A* 111: 5283-5288.
- 428 Wu, J., Q. Zhao, Q. Yang, H. Liu, Q. Li *et al.*, 2016 Comparative transcriptomic analysis uncovers the complex genetic  
429 network for resistance to *Sclerotinia sclerotiorum* in *Brassica napus*. *Sci Rep* 6: 19007.
- 430 Xu, F., C. Fan and Y. He, 2007 Chitinases in *Oryza sativa* ssp. *japonica* and *Arabidopsis thaliana*. *J Genet Genomics* 34:  
431 138-150.
- 432 Xu, G., C. Guo, H. Shan and H. Kong, 2012 Divergence of duplicate genes in exon-intron structure. *Proc Natl Acad Sci U*  
433 *S A* 109: 1187-1192.
- 434 Xu, J., X. Xu, L. Tian, G. Wang, X. Zhang *et al.*, 2016 Discovery and identification of candidate genes from the chitinase  
435 gene family for *Verticillium dahliae* resistance in cotton. *Sci Rep* 6: 29022.
- 436 Yamamoto, T., H. Iketani, H. Ieki, Y. Nishizawa, K. Notsuka *et al.*, 2000 Transgenic grapevine plants expressing a rice  
437 chitinase with enhanced resistance to fungal pathogens. *Plant Cell Reports* 19: 639-646.
- 438 Yeh, S., B. A. Moffatt, M. Griffith, F. Xiong, D. S. C. Yang *et al.*, 2000 Chitinase genes responsive to cold encode  
439 antifreeze proteins in winter cereals. *Plant Physiology* 124: 1251-1263.
- 440 Zarinpanjeh, N., M. Motallebi, M. R. Zamani and M. Ziaei, 2016 Enhanced resistance to *Sclerotinia sclerotiorum* in  
441 *Brassica napus* by co-expression of defensin and chimeric chitinase genes. *J Appl Genet* 57: 417-425.

442  
443  
444  
445  
446  
447  
448  
449  
450  
451  
452  
453  
454  
455  
456  
457  
458  
459  
460  
461  
462  
463  
464  
465  
466  
467  
468  
469

470

471

Supplementary Figure 1

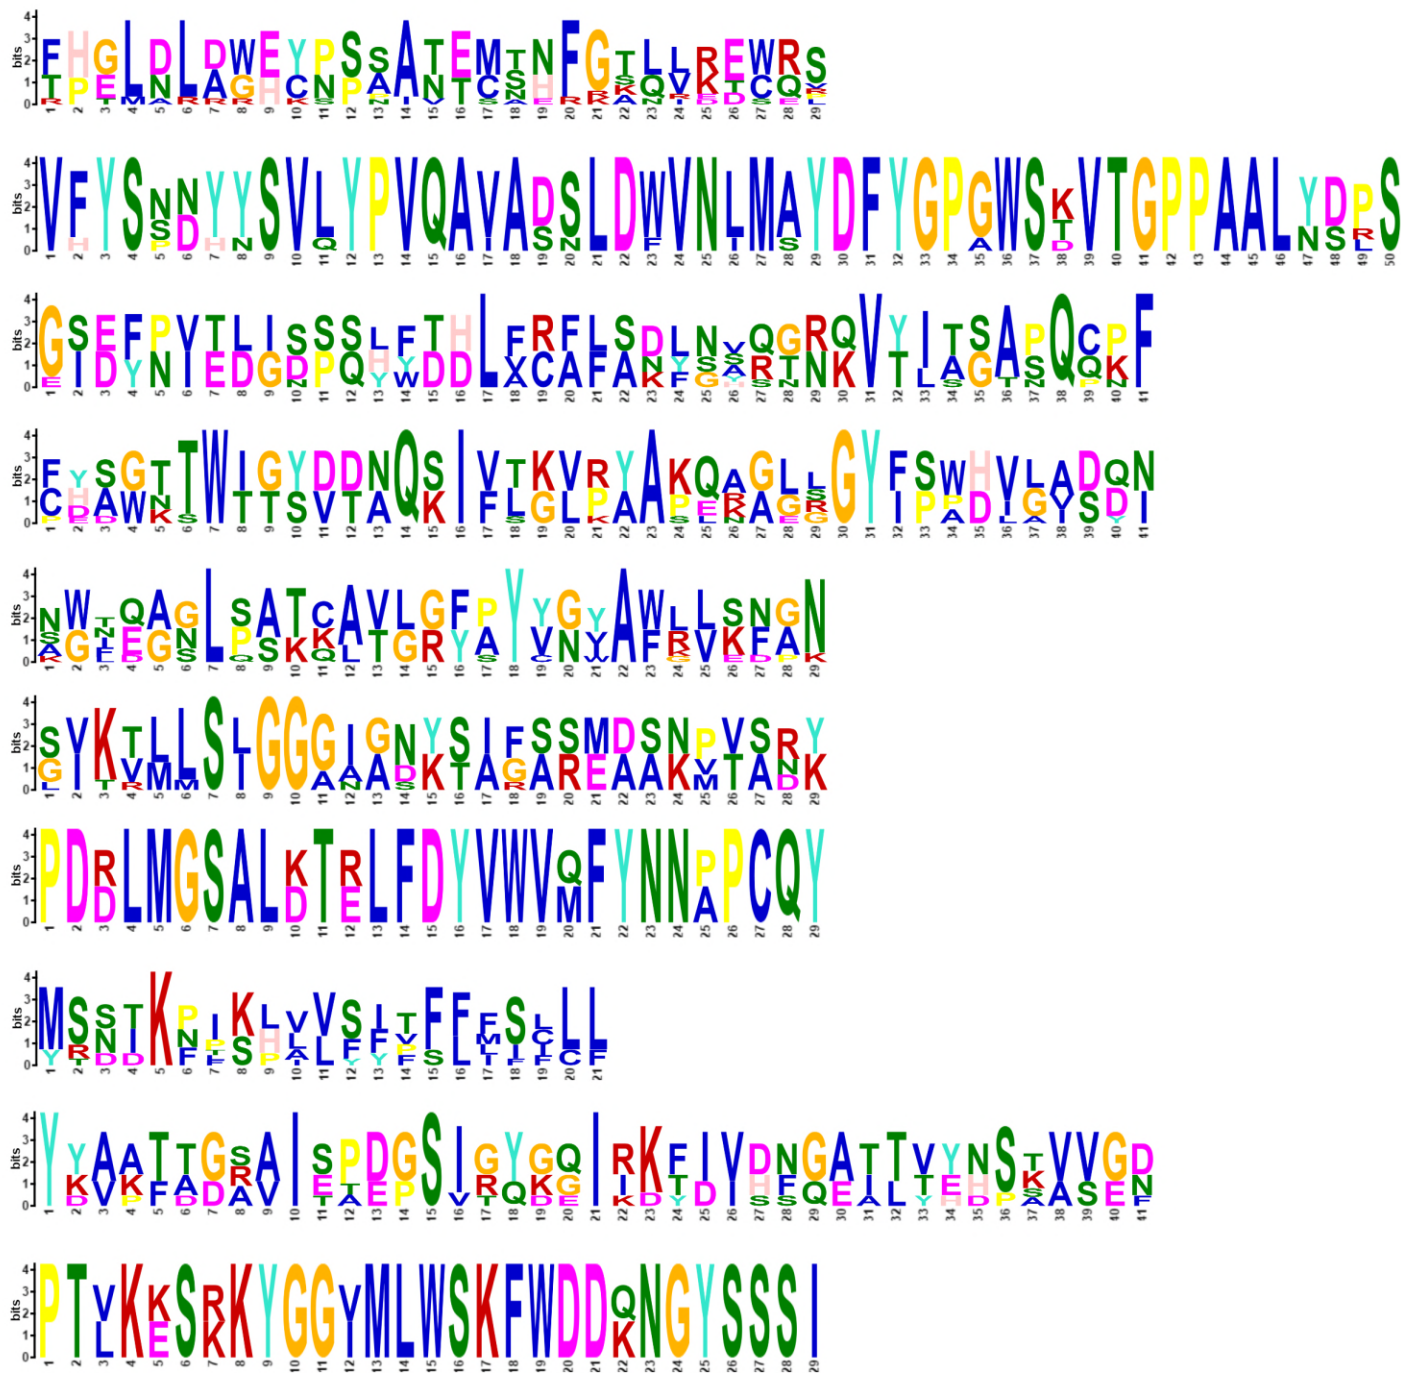

472

473

474

475

476

477

478

479

480

481

482 Supplementary Figure 2

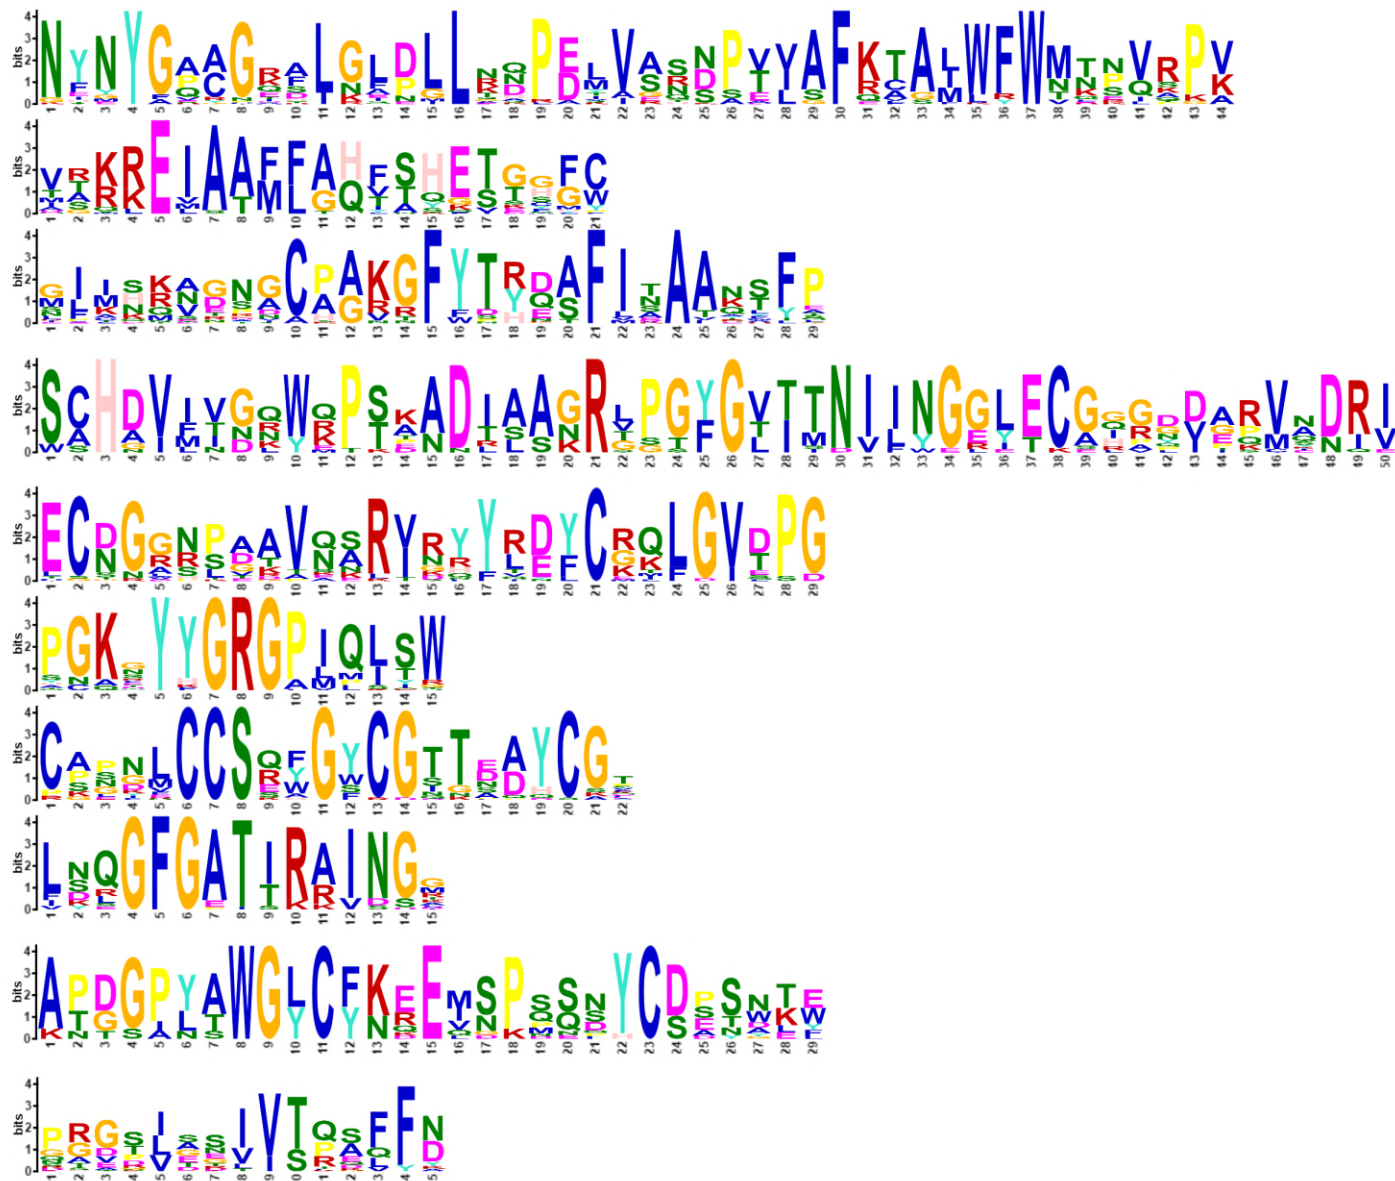

483

Supplementary Table 1 Amino acid sequences of 68 chitinase genes in *B. napus*

>BnaA06g26630D

MSNIKNFKPVLSSFFFISSCFCKPSHPSRGLAIYWQNGFEGSLSSTCATGRYA YVNIAFLVKFGNGQTPELNLAGHCNPAAN  
TCTHFGAQVKTCQLRGIK VFFLITRLLSLGGAIGNYSIRSREDAKMVADYLWNNFLGGKSSARPLGDAVLDGIDFNIELGSP  
QHWDDLVRFLSNFSYRGRKVYITGAPQC PFDLLMGSALKTRLFDYVWVMFYNNPPCQYTS GDTQSLFHSWKTWTTSVT  
AQKIFLGLPAAPEAAEGGYIPADVLVSQILPTVKKSRKYGGVMLWSKFWDDKNGYSSSIVARV\*

>BnaA05g26640D

MKTCLLLFLIFSLLSFSSAEQCGRQAGGALCPNGLCCSEFGWCGNTEPYCKQPGCQSQCGGTPPGPTGDLSGIISRSQFDD  
MLKHRNDNACPARGFYTYDAFINAAKSFPFGFTTGDATRKKIEIAAFFGQTSHETTGGWATAPDGPYSWGYCFKQEQNPS  
SNYCSPSAEWPCASGKSY YGRGPMQLSWNYNYGQCGRAIGSDLLNPNPDLVSNPVI AFKAAIWFWMTPQSPKPSCHA VIV  
GQWQPSDADRAAGRVPGYGVITNIINGGLECRGQDARVADRIGFYQRYCNILGVNPGGNLDCYNQRSFASVNFFLDAAI  
X

>BnaC03g63440D

MASNPTSRSKSFIDSSIRLARSNGFHGLDLWDWEYPSSATEMNNFGTLLREWRSAVAEASSTSRPRLLLAAAVFYSSDYYSVL  
YPVQAVASSLDWVNLMA YDFYGPWSTVTGPPAALNSLSNAGPSGDAGVRAWIQAGLPATQLVLGFPYYGYAWRLSNA  
NSPSYYAATTGSAISPDGSIGYQIRKFIVDNGATTVYNSTVVGDYCYAGTSWIGYDDNQSIVTKVRYAKQKGLRGYFSWH

VGADDNSGLSRSVSRAWDATVATTVIRKFX

>BnaC01g41020D

MSSTKPISELLVSITFFFLLSSSSAQS VVKASYWFPGSEYPVTDIDSSLFTHLFCAFADLNAQTNQVTIASASQQNFSTFTQTV  
QRRNPSVKTLISIGGGNASKTAFASMASNPTS RKS FIDSSIRLARSNGFHGLDL DWEYPSSATEMSNFGTLLREWRSAVA AE  
ASSSGRQRLLLAAAVFYSNHYSVLYPVQAVADSLDWVNLMA YDFYGP GWSKVTGPPAALYDPSNAGPSGDAGVRSWT  
QAGLPAKKA VLGFPYGYAWGLSNANTAVTISGAAIPEDGTTWIGYDDNQSIVTKVRYAKQRGLLGYFSWHV GADDNSG  
LSRAATRAWDAAATTRTIQKNX

>BnaA09g05050D

MSNIKFPKHV LFFVLLIFLLNQSSDAYGGIAIYWQNGNEG NLSSTCATGRYAYVNV AFLVKFGNGQTPELNLAGHCNPA  
ANTCTHFGSQVKDCQSRGIKVM LSLGGGIGNYSIGSREDAKVV ANYLWNNFLGGKSSSRPLGDAVLDGIDFNIELGSPQYY  
DDLARFLSKYGV RGRKVYLTGAPQCPFPDRLMGSALDTELFDYVWVQFYNNAPCQYTS GNTKSLFDSWNTWTT SVTAQK  
IFLGLPAASQAAGSGYIPPDILISQILPTL KESKKYGGIMLWSKFWDDQNGYSSSILASVX

>BnaA09g00340D

MEKQISLSLCLFLFILSIS SFLQETEARKYSYRRAPITRLVSRSLYDSIFIHKENNA CPAKGFYPYEAFL EATRWFPRFGSVGGI  
TTRREVA AFLAQISHETTGGWATAPDGPYAWGLCFKEEVSPQSNYCDASNTEWPCFP GKS YKGRGPIQLSWNYNYGQAG  
RALGFDGLRNPE SVANNSVLAFKTA LWFWMTEQTPKPSCHDVMVNR YRPTKADIAANRTSGFGLTTNIINGGLECGIPGDG  
RVNDRVGYFQRYAKLFNVNTGPF LDCENQRPF SX

>BnaC04g48920D

MATQRAILKNALILFLFTLTIIPKTAFSQNC GTYGCAGNLCCSRYGYCGTTLDYCGTGCRSGPCSSGTTPTPTGGW GGLNAD  
PRDTIENVVTPAFFD GIMSRVGYGCPAKGFYTRQAFITAAQSFSAYQGTVAKREIAAMLAQFSHESGSFCYKEEIARGRYCQ  
ASTAYPCQPGKDY YGRGPIQITWNFN YGAAGRFLGLPLL TDPDMVAR SPEVAFKCAMWFWNQNVRPVL DQGF GATT RRI  
NGGECNGGRPAAVQSRVDRYLEFCRMFGITPGANLSCX

>BnaC04g49090D

MALTKISSVFLICLFGFY SQTAKSQFCGCSPIRCCSQHG YCGITDQHCGSGCQSGPCRTSREP VDEIVTQKFFDGIINQSRNGC  
AGKRFYTRESFLS AANTTLNFN SIVTRLEIAAMFAHFSHETE HFCYIEEVNGTSRDYCDENRQYPCVPGKGY YGRGPIQLS  
WNSMYGECGDTLKLPLLSQPELVGSNSTVSFR TGLRFWMKSLRPVLKEGF GATIRAINGRECDGGNSGAVSARTGFYR DY  
CRQLGVDPGANIACX

>BnaC04g49100D

MATHKALLKNALILSLFTL TILAETAFAFSQNC GKTGCKGNMCCSRWGYCGTTNAYCGTGCQSGPCKSKPKPTPTPSGSGGLN  
AGPRGTIASV VTPAFFNSVMSK VGNCPAKGFYTRQAFIAAAQSFAAYKGTVAKREIAAMLAQFSHESGSFCYKEEIARGR  
YCSPSKTYPCQPGKNY YGRGPIQITWN YNYGAAGKFLGLPLL KDPDMVAR SPTVAFKCAMWFWNLNVRPVL SRGFGATT  
RRINGGECDDGGRPAAVQSRVNH YLDFCKKLGVT PGTNLK CX

>BnaC04g53030D

MKYAKTTSRNDQFATLLTTLFFLILTVSKPVASQNCGCASGLCCSSAGYCGTTDAYCGEGCKE GPCKNSESNCPGKGFYTH  
ETFMAAANA YPSFGASISKREIAAFFAHVAQETGFMCHIEEVDGPAKAARGEYCDTTKPEFP CVQKGYYGRGAIQLSWN  
YNYGPCGRDLNEG DLLATPEKVAQNQVLA FKASFWYWTNVRSSFKSGFGATIRAVNSRECSGGDSTEKAANRVR YFQD  
YCGKLGVPGENLTCX

>BnaC04g53040D

MATQISILKNTLVFLFTL TILTKTAFSQHCGFTGCASF MCCSRYGYCGTTADYCGTGCRSGPCSYESGGVGLNAGPRDRIP  
NVVTTAVFAGIMSKVENGC PAKGFYTRQAFISAAQSFPAYRGTVAKREIAAMLAQFSHESDSFCYKEEIARGRYCQASSVY  
PCQPGKNY YGRGPIQITWENYGAAGKFLGLPLL TDPDMVAR NPDAFKCAMWFWNEKVRPVVDQGF GATT RRINGGEC  
DGGSPTRVQSRVNRYLEFCRQFGISPGTSLSCX

>BnaA01g34980D

MSSTKPISELLVSITFFFLLSSSSAQS VVKASYWFPGSEYPVTDIDSSLFTHLFCAFADLNSQTNQVTIASASQQKFSTFTQTV  
QRRNPSVKTLISIGGGAADKTA FASMASNPTS RKS FIDSSIRLARSNGFHGLDL DWEYPSSATEMSNFGTLLREWRSAVVAE  
ASSSGRQRLLLAAAVFYSN NYYSVLYPVQAVADSLDWVNLMA YDFYGP GWSKVTGPPAALYDRSNAGPSGDAGVRSWT  
QAGLPAKKA VLGFPYGYAWRLSNANSHSYYAPTTGAAISP DGSIGYQIRKFIVDNGATT VYNSSVVDYCYAGTTWIG  
YDDNQSIVTKVRYAKQRGLLGYFSWHV GADDNSGLSRAATRAWDAAATTRTIQKFX

>BnaC09g51720D

MAFTKVSLVIFLSLVGPCRSNIRTPNGGG SVSSIVTQQFFNNIIQKAGSGCAGKTFYTHDSFINAANTFPNFGNSVTRREIATM  
FAHYSQGTGHFCYIQAINVTLRRDECEPERQTSCDPPGIGYFVRGERLNIDLLRQLEL VRSNPTLGFKTSLLFWMNSVRPVL  
NQFGGATIRAINGTECNGGNLVA VNERIRYRDYCRQLGVDPGSNLSCX

>BnaC05g03990D

MVTIRSVSVFILVLLAVSSLLL VANGEDKTIKVKKVKGKVKCTQGWECVWWSEYCCNQTISDYFQVYQFEQLFAKRNTPIA  
HAVGFWDYQSFITAAALFEPLFGTTGGKLMGQKEMAAFLGHVASKTSCGYGVATGGPLAWGLCYNREMSPMQSYCDE  
TWKYKYP CSPGA EYYGRGALPIYWNFN YGAAGEALKADLLNHPEYIEQNATLAFQA AIWRWMTPIKKAQPSAHDFVGN  
WKPTKNDTLSKRGPFTFGTTMNVLYGEYTCGQGDIEPMSNIVSHYLYFLDLLGIGREDAGPNEELSCAEQKAFNPATAPSTSP  
SX

>BnaCnng39650D

MALTKISLVFLLCLLGPCRSGTPSGGGSVGSIVTQGGFFNNIINRAGNGCAGKRFYTRNSFINAANTFPNFANSVTRREIATMFAHFTHETGHFCYIEEINGASRDYCDENNRQYPCSPGKGYGRGPIQLSWNYNYGPCGRSLGLNLLGQPELVGSNPTVAFRTGLWFWMNSVRPVLNQGFGATIRAINGMECNRGNPDVAVNARIRYRNYCRQLGVDPGPNLGCX

>BnaA08g31740D

MVTIRSASVFILVLLAVSTLALVANGEDKTIKVKKVKGKKVCTQGWECVWWSEYCCNETISDYFQVYQFEQLFAKRNTPV AHAVGFWDYQSFITAAALYEPLGFGTTGGKLMGQKEMAAFLGHVASKTSCGYGVATGGPLAWGLCYNREMSPSQSYCD ETWKFKYPCSPGAEYGRGALPIYWNFNYYAAGEALKADLLNHPEYIEQNATLAFQAAIWRWMTPIKKAQPSAHDIFVGN WKPTKNDTLSKRGPTFGTTMNVLYGEYTCGQGDIEPMNNIVSHYLYFLDLLGIGREDAGPNEELSCAEQKAFNPSTAPTSSS SX

>BnaA04g25220D

MALTKISSVFLICLFGFYQSATAKSQFCGCSPIGCCSQHGICYDITDQHCGSGCQSGPCRTSREPVEKIVTQKFFDGIINQSRNGC AGKRFYTRESFLSAANTTLNFNSIVTRLEIAAMFAHFTHETGHFCYIEEVNGTSRDYCDENNRQYPCVPGKGYGRGPIQLS SNFMYGECGDTLKLPLLSQPELVGSNSTVSFRTGLWFWMKSLRPVLKEGFGATIRAINGKECDGGNSGAVSARTGNRYDY CRQLGVDPGANINX

>BnaA04g25230D

MASQKMLLKNALIVLLFTLILAEAFSQNCGKTGCKGNMCCSRWGYCGTTNAYCGTGCGNPGCKSKPKPTPTPSGSGGL NAGPRGTIASVVTAPFFNSIMSKVGNCGPAKGFYTRQAFIAAAQSFPAYKGTVAKREIAAMLAQFSHESGSFCYKEEIARGR YCSPSKTYPCQPGKNYGRGPIQITWNYNYGAAGKFLGLPLLKDPDMVARSPTVAFKCAMWFWNLNVRPVLRSRFGATT RRINGGECDDGRPAAVQSRVNHLYDFCKKLGVTPTGNLKCX

>BnaA03g56430D

MTLTKTSLVLLCCLLGFYSETVKSQNCGCSPDLCCSQFGFCGTGNDYCGPGCQSGPCTTQAESLGTIVSQSFFDGITNRAGS DCAGKGFYTRDAFINAANTFPNFANSVTRLEIATMFAHFTQEVGYFCYIEEINGASQNYCNDKDFPQYPCAAAGKNYGRGPI QLSWNYNYAPCGQSLGLDLLNQPELVGSDPTVAFRTALWFWVNNVRPVLSSQGFATIRAINGKVECDGASPKVNSRIRY YREYCEQLGVPEPGSNLSCX

>BnaA05g08640D

MALTKISLVLLCCLLYSETVKSQNCGCASGVCCSQYGYCGNGPDYCGSGCRSGPCTGTQGGSLGSIVSQAFFNNIINRAD NGCAGKRFYTRDSFISAANTFPNFANSVTRREIATMFAHFTQEVGYFCYIEEINGASRNYCDDRNYPQYPCAPGKTYGRGP IQLSWNYNYAQCGQSLGLDLLRQPETVSSNPTIAFRTALWFWVNNVRPVLNQGFGATIRAINGDLECNRSPDKVNARISY YRDYCGQLGVDPGPNLSCX

>BnaA09g15430D

MAFTKVSLVIFLSLVGLYSVTAKTQKCGCAPNLCCSQFGSCGTNDADCGAGCRAGPCRSNIRTPNGGGSVSSIVTQQFFNNI IQKAGSGCAGKTFYTHDSFINAANTLPNFGNSVTRREIATMFAHYSQGTGHFCYIQAINGTLRRDACQEPQRQMPCHPPGIG YFVRNEHLNIDLLRQRELVRNPTLGFKTSLLFWMNSVRPVLNQGFGATIRAINGTECNGGNLVAVNKRIRYRNYRQYCGQLG VDPGPNLSCX

>BnaA09g15440D

MAFTKVSLVIFLSLVGLYSVTAKTQKCGCAPNLCCSQFGSCGTNDAYCGAGCQAGPCRSNIRTPDGGGSVSSIVTQQFFNNI IQKAGSGCAGKTFYTHDSFINAANTLPNFGNSVTRREIATMFAHYSQGTGHFCYIQAINGTLRRDACQEPQRQMPCHPPGIG YFVRNEHLNIDLLRQRELVRNPTLGFKTSLLFWMNSVRPVLNQGFGATIRAINGTECNGGNLVAVNKRIRYRNYRQYCGQLG VDPGPNLSCX

>BnaC05g40680D

MLYYKYLYLPKDTIKLKAKMKSCLLLFLIFSFLSFLSLAEQCGRQAGGALCPNGLCCSEFGWCGDTEAYCKQPGCQSQCGG TPPGPTGDLSGIISRSQFDDMLKHRNDNACPARGFYTYDAFINAAKSFPFGFTGDTATRKKEIAAFFGQTSHETTGGWATA PDGPYSWGYCFKQEQNPSSNYCSPSAEWPCASGKSYGRGPMQLSWNYNYGQCGRAGSDLLNPNPDLVSNPVIKAAI WFWMTQPSPKPSCHAVIVGQWQPSDADRAAGRVPGYGVITNIINGGLECGRGQDARVADRIGFYQRYCNILGVNPGGNLD CYNQRSFASVNFLLDAAIX

>BnaC03g24270D

MANNAKSTTKKHPLVLLTTLVSVLILTVSKPVTSQNCGCASDFCCSKWGYCGQTEDYCGDGCREGPCQGGGGGGGGGGG DA VLSLEETVTPPEFFNSIISQARDGCAGKGFYSHNAFIAAANSYPSFGSSISKREIAAFFAHVTHETEFMCYIEEIDGPAKAEDY CDKENTDFPCAPGKGYGRGPIQLSWNYNYGQCGRDLNENILASPEKVAQDPALAFKTAFFWFTTNVKGKFNQGFATIR AINGMECSGRNPATVEKRIGYFRDYCGKLGVEPGDNLSCX

>BnaC03g24280D

MASKKISLILLLSLFSYSEIVKSQNCNCPNVCCSQFGYCGTTAAHCSPTCRSGFFDGIINQAGNGCAGKRFYTRDSFINATT TFPVANSVTKREIATMFAHFTYQGTGHFCYIEEINGASRSFCDQSNRQYPCAPGKSYHGRGPLLRSWNYNYGPCGQSLGLD LLRQPELVSSKPVVAFRTAMWFWMKSVRPVLNQGFGATIRAISSLECNRNGLGAVNARIRYRNYRQYCGQLGVDSGANVTCX

>BnaC03g24290D

MALTKLSLVFLCCLLGLYSETVKSQNCGCAPNLCCSQFGYCGSTDAYCGTGCRSGPCRSPPGGTSPAGGGSVGSIVTQAFFN GIINQAGGGCAGKNFYTRDSFINAANTFPNFANSVTRREIATMFAHFTHETGHFCYIEEINGASRDYCDENNRQYPCAPGK

GYFGRGPIQLSWNYNYGACGQSLNLLGQPELVSSNPTVAFRTGLWFWMNSVRPVLNQGFGATIRAINGMECNGGNSG  
AVNARIRYRDYCGQLGVDGPNLSCX

>BnaC03g24300D

MSNRNATVENALLSFFLAFVMAKTVFSQDCQSTGCPGLKECCSSWGS CGIKDDQCGFWCFSGLCNLKNKSYGFDY NVSA  
GPRGPIESIVTPSLFKRIMSKVGNNPCAKGFYTHQAFISAVKSFQAYKGTVAKREIAAILTHFAHGSKGFCYKEDKARGRYC  
SPSKKYPCEPGKQYYGRGPLQSIRWNEY YGAAGIFLRLPMLKDPDMVAHSPEVAFKLALWFWTTNVRPALYLGFGETSKR  
VDGRLCDNLHPDDTKNLVKQYVDLCKILGVTPEGLSCX

>BnaC03g24310D

MCIYLNFLNLRFCYKEEISPEKYCSKSKYPCEPGKYYYGRGLLQSITWNEY YGAACKHLGLPLLKDPDLVARSPEVAFK  
FAMWFWNRNVRPALYLGFEITKRVDGRECSNWRRDGPNSKV KQYIEFCKMLGVTPDQGLDCFX

>BnaC03g24330D

MAIQNAILKHALIHFLFILAILAENAFTQNCMDTSCPLKQCCSRWGSRTGEDIYCGFFCFSGPCNIKGYKYGYDYNVEAGP  
GGKIESITPALFDSIMSKVESNCSAKGFYNYKAFITAFKSFGAYKGVAKREIAAIFAHFSYGSKAYFNSDERYPTQLSQRQ  
YHX

>BnaC03g24340D

MATHNVLLKNALMIFLFTLTIMTETAFAFQNCGKTGCKGNMCCSRWGYCGTTNAYCGTGCQSGPCKSKPKPTPTPSGSGGL  
NAGPRGTIASVVTAPFFNGIMSKVGRGCPAKGFYTRQAFIVAAQSFAAYKGTVAKREIAAMLAQFSHESGSFCYKEEIARG  
RYCSPSTTYPCQPGKNYYGRGPIQITWNYNYGAAGKFLGLPLLKDPDMVARSPTVAFKCAMWFWNKNVRPVLRSRFGAT  
TRRINGGECDDGRPAAVQSRVNHYLDFCKKLGVTPTGTNLKXC

>BnaC03g24360D

MDTHQVRVILFLFTLTITKT VFSQHCSTTG CAGNLCCSRYGYCGTTSAYCGTGCRRGPCSSGATPVSPPTGGTGLNAEPR  
DTIANVVTQSFDDGIMSKVGNNGCPAKGFYTRQAFIDAAQSFPAYQGAVSKREIAAMLAQFSHESGNFCYKEEIARGRYCQA  
STVYPCQPGKDYGRGPIQITWNYNYGAAGKFLGLPLLDPDMVARSPEVAFKCAMWFWNQNVRPVLDQGF GATTRKIN  
GGECNGRRPAAVQSRVDRYLEFCRTFGITPGTSLSCX

>BnaC05g01140D

MAQPSFLLFCIFLSFFSILSSYQTKATTITRLVSKSLYDSMFIHKDNTACPANGFYTYESFVKATGRFPRFGSVGSMETRRREV  
AAFLAQISHETTGGWPTAPDGPYAWGLCFKKEEISPSQSNYCDSSNTEWPCFSNKTYHGRGPIQLSWNYNYGPAGRALGFDGL  
RNPEIVANNSVIAFQ TALWFWMTEQSPKPSCHDVMIGRYPTEADLAANRTGGFGLTNIINGGLECGIAGDGRVNDRIGFY  
QRYAGLLNVGTGPNLDCENQRPFAF

>BnaA10g03880D

MVTIRSVSVFILVLLAISSLALVANGEDKTIKVKVKVKGKVVCTQGWECVWWSEYCCNQTISDYFQVYQFEQLFAKRNTPIA  
HAVGFWDYQSFITAAALFEPLFGTTGGKLMGQKEMAAFLGHVASKTSCGYGVATGGPLAWGLCYNREMSPMQSYCDE  
TWKYKPCSPGAEYYGRGALPIYWNFN YGAAGEALKADLLNHPEYIEQNATLAFQAAIWRWMTPIKKAQPSAHDIFVGN  
WKPTKNDTL SKRGPTFGTTMNVLYGEYTCGQGDIEPMSNIVSHYLYFLDLLGIGREDAGPNEELSCAEQKAFNPATAPSSN  
SSX

>BnaUnng03570D

MTSTKPISSLVSITFFFSLLSSSSAQS VVKASYWFPGSEYPVTDIDSSLFTHLFCAFADLNAQTNQVTIASASQKQFSTFTQTV  
QRRNPSVKTLLSIGGGAADKTAFA SMASNPTRKSFIDSSIRLARSNGFHGLDL DWEYPSSATEMSNFGTLLREWRS AVVAE  
ASSSGRQRLLLAAAVFYSN NYYSVLYPVQAVADSLDWVNLMA YDFYGP GWSKVTGPPAALYDPSNAGTSLTX

>BnaC01g38390D

MKTLLLLLLNLFLLS FSSAEQCGRQAGGALCPNNLCCSEYGWCGSTEAYCALPGCQSQC TSPGPPPPPPPPGPPPPDPTGG  
LTDIITTSQFDDMLKHRNDAAC PARGFYTYDAFITAAKYFPCFCNNGDTAARKKELSAFFGQTSHETTGGWPTAPDGPYAW  
GYCFKKEE VSPSSDYCSPSGT WPCAPGKRY YGRGPMQLSWNYNYGQCGAAIGEDLLNPN DLVSNDPVISFKTAIWFWMTPQ  
SPKPSCHAVINGQWQPSPADIAAGRVPGYGVTTDIINGGLECGHGPDP RVIDRIGFYQRYCGIFGVNTGDNLDCFNQRPFAF  
KSFLDAAIHLFLMHYKTRFKIEAYLNVNYRNFTNIFTEILD LNX

>BnaC01g38450D

MNTLLLLLLLILSFLS FSSAEECGTTPRACPARGFYTYEAFITAA YYFTSFARGRDTAARKKELAAFFGQTSYESTGHPKNT  
SIYTWGYCYKEELNPPSDY CSPSDTWPCVPGKRY YGRGPVLLKGNHEYGSYQALNADLLNPN DLVSNDPVIAFKVAILF  
WMKPVPPKSWSHGV LINLWRPSTADIAAGRLPGYGVISNIFNGRIECGHGYDARVADRIGFYRRYCEILGADLGDNLDCYN  
QRFPDPVICPSTLLFNKEX

>BnaA01g30560D

MKTLLLLLLNLFLLS FSSAEQCGRQAGGALCPNNLCCSEYGWCGSTEAYSALPGCQSQC TSPGPPPPPPPPGPPPPDPTGG  
LTDIITRSQFDDMLKHRNDAAC PARGFYTYDAFITAAKYFPCFCNNGDTAARKKELSAFFGQTSHETTGGWPTAPDGPYA  
WGYCFKKEE VSPSSDYCKRY YGRGPMQLSRAFLNSILSWNYNYGQCGAAIGEDLLNPN DLVSNDPVISFKAAIWFWMTPQS  
PKPSCHAVINGQWQPSPADIAAGRVPGYGVTTNIINGGLECGHGPDRVYDRIGFYQRYCGIFGVNTGDNLDCYNQRSFAS  
FKSFLDAAMX

>BnaA01g30550D

MLKHRNDPACPARGFYTYEAFITAA YFFTSFARGSDTAARKKELAAFFGQTSYESTGHPKNTSIYTWGYCYKEEMNPPSDY

CSPSDTWPCIPGKRYGRGPVLLQGNHEYGAYGQALNADLLNPNPDLVSNPVI AFKVA I LFWMKPVPPKPWSHGVLINLW  
RPSTADIAAGRLPGYGVITNIFNGRIECGHGYDARVADRIGFYRRYCEILGADPGDNLD CYNQRPFD PVICPSTLLFNKEX

>BnaC05g36460D

MIILVRIQHGRLLHRNRRVHLHLQDYTDNLDQPLCLCLYTDPPSLSYSPCSRNP SLQGNILFFFPYLQDTPLLSKSTRLQLS  
ILTPHGLHHLTRRLQQLLAHAVGFWDYRSFINAAAEYQPLGLDTAGDKLQGMKEVA AFLGHLNRFIKCGYGVATGGPLA  
WGLCYNKEMSPDQFYCDDYKLTYPCTPGVSYHYVAPPTHA VDPPLWQSKRLPWTYGVISITRFNDSTLAFQAAIWRW  
MTPPRKHVLSAHNVFVGKWKTKKNNTAANRSPGFGTTINILWELEEKELVLVISCADQEPFSSSSSSSPSTRSSSX

>BnaC08g25210D

MLTHAISKPIVITILLVLQAFYTTTKAQNCGCPDLCCSQFGFCGTSYDYGVCQCGPCFAPPANGVSVDEIVTQEFFNGI  
IDQAESSCAGNGFYSRGAFLEALESYRFARIGSVDDSRREIAAFFAHVTHETGHFCYIEEINGPSRDYCDENATQYPCPNPK  
GYYGRGPIQLSWNFNYGPAGTAIGFDGLNAPETVATDPVISFKTALWYWTNRVQPVISQGFATIRAINGALECDGANSAT  
VQARVRYYTEYCRQLGVDPGNNLICX

>BnaC08g25190D

MLIHFTFTNKKHYGENYIIRIQLQEESLSSGYCRDISRSLGDEEQKTLYAKLGDILLTQTAGEVLRSEYLCCSQFGFCGTSYD  
CGVGCQQEPFCFAPPANGVSVDEIVTQEFFNGIIDQIEIGSVDDSRREIAAFFAHVTHETGHFCYIEEINGPSRDYCDENATQY  
PCPNPKGYYGRGPIQLSWNFNYGPAGTAIGFDGLNAPETVATDPVISFKTALWYWTNRVQPVISLGFATIRAINDALECD  
GANSATVQARVRYYTEYCRQLGVDPGNNLT CX

>BnaC03g37570D

MKTYLLLLLLSLLSFSSGEQCGRQSKPAGALCPNGLCCSEAGWCGTTEAYCGHGCQSQCNP GPYPPTPHGDLSGIISR  
DQFYKMLKHMNDNDCHAVGFFTYDAFITA AAKSFPSFGNTGDLAMRKEIAAFFGQTSHETTGGW SGAPDGANTWGYCY  
KEEIDKSDPHCKFYGRGPMMLSWN NYGPCGRDLGLELLKNPDVASSDPVIAFKTAIWFWMTPQAPKPSCHDVITDKWE  
PSAADISAGRLPGYGVITNIINGGLECAGR DVAKVQDRISFYTRYCGMFGVDPGSNIDCDNQRPFNEGSNVFLDAAIX

>BnaC03g37600D

MKTYLLLLLIFLFSLLSFSSGQCGRQAQGALCPNGLCCSQYGWCGTTEAYCGRGCQSQC TPTPTPTPNPPSPTPPRPTPPGP  
SGDLSGIISR DQFYKMLKHMNDNACPARGFFTYDAFITA AAKFFPSFGNTGDLATRKKEIAAFFGQTSHETTGGWADAPDGA  
NTWGYCFKDEIGKSNPYCQFYGRGPMMLSWN NYGQCGRDLGLDLLRRPAIASSDPVIAFETA IWFWMTPQAPKPSCHD  
VITDQWQPSAADISAGRLPGYGVITNIINGGLECAGR NVAQVQDRISFYTRYCGMFGVDPGSNVDCDKQRPFSEGSNVFLD  
AAIX

>BnaC03g37610D

MLLHMNDNACPARGFFTYDAFITA AAKSFPSFGNTGDLATRKKEIAAFFGQTSHETTGGWPTAPDGANTWGYCFKEEIDKN  
EQHCDSNNLEWPCSTGQSYGRGPIMLSWN NYGPCGRDLGLDLLDNPALASSDPVIAFKTAIWFWMTPQAPKPSCHDVI  
TGQWQPSAADIAAGRLPGYGLITNIINGGLECSGRNVPQVKDRISFYTRYCGDKIFGVDPGSNLD CDKQRPFNEGSNVFLD  
AIX

>BnaA03g32280D

MKTYLLLLLIFLFSLLSYSSGQCGRQAQGALCPNGLCCSEYGWCGTTEAYCGRGCQSQC TPTPTPTPTPPSPTPPRPTPPGP  
SGDLSGIISR DQFYKMLKHMNDNACPARGFFTYDAFITA AAKFFPSFGNTGDLATRKKEIAAFFGQTSHETTGGWTDAPDGA  
NTWGYCFKDEIGKSNPYCDSNNLEWPCAPGQFYGRGPMMLSWN NYGQCGRDLGLDLLRRPAIASSDPVIAFETA IWF  
WMTQAPKPSCHDVITDQWQPSAADISAGRLPGYGVITNIINGGLECAGR NVAQVEDRISFYTRYCGMFGVDPGTVLGRLP  
GTTVYRNMKQFPEAYTYNGIVIVRVD APIYFANISYIKDRLE YEVAFDKHTNKGPEVERIYFLILEMSPV TYIDSSAVEALK  
ELYQEYKTRDIQQLAISNPNKEVLLTLARSGIVELIGKEYFVRVHDAVQVCLHYVESKNQPTNVESSSSSLWRRCAK  
NSSHTEVEPDSKLVLKEPLLFNDKX

>BnaA03g32270D

MLKHMNDNDCHAVGFFTYDAFITA AAKSFPSFGNTGDLAMRKEIAAFFGQTSHETTGGW SGAPDGANTWGYCYKEEIDK  
SDPHCKFYGRGPMMLSWN NYGPCGRDLGLELLKNPDVASSDPVIAFKTAIWFWMTPQAPKPSCHDVITDKWEPSAADI  
SAGRLPGYGVITNIINGGLECAGR DVAKVQDRISFYTRYCGMFGVDPGSNIDCDNQRPFNEGSNVFLDAAIX

>BnaA03g26800D

MARRREKRSSATESSERRHNRDESKPRDGEPDSRRLITIFVFFIVIPAVSMAVYKVKFADR VIEAEPSIRQKGIKTDIHFQE  
ILTEHSASENSARHYDYPVLA YITPWNSKGYDMAKIYNSKFTHLSPVWYDLKSQGNGLVLEGRHNADKGWIQELRSKG  
NAMILPRV VLEAVPEEMLKKKKLR AKA INLIVTECKEMEFD GIVLESWSRWAA YGVLHDPDMRKMA LQFVKQLGDALHE  
QQMQFMYVIGPPRSDLQMYDFGPDDLKFLKDSVDGFSLMTYDFSNSQNP GPNA PLK WIDITL KLLL GSSSNVDSSLAKKV  
LLGLNFYGNDFASSGGDGAITGRDYLALLQKHKPTLHWDKESGEHLFMYRDDKNIKHAVFYPSLMSILLRLENARLWGI  
GISIWEIGQLDYFFHLLX

>BnaA10g05680D

MFAHFTHATGHFCNIEVINGRSRKVQKKRNGRSRND CDENPIQDDCSPGKDLQSPSELVGNPTVSFKTSLW FWMNSVRPVL  
NQFGFATIRAINGIECNGGNSDA VNERIRYRYCRQLGVDPGSHLSCX

>BnaCnng01370D

MEKQISLSLCLFLFILSISSFLQETEAR KYSYRRAPITRLVSRSLYDSIFIHKENNA CPAKGFYPYEA FVEATRWFPRFGSVGGI  
TTRRREVA AFLAQISHETTGGWATAPDGPYAWGLCFKEEVSPQSNYCDASNTEWPCFP GKSYKGRGPIQLSWN NYGQAG  
RALGFDGLRNPE SVANNSVLA FKTA LWFWMTEQTPKPSCHDVMVNR YRPTKADIAANRTSGFGLTTNIINGGLECGIPGDG



RVNDRVGYFQRYAKLFNVNTGPYLDCEENQRPFSSX

>BnaA08g09330D

MSSTKPTSLIVSITFFFFCLLLQHSSAQTVVKGSYWFPESEFPVTDINSSHFTHLFCFADLNSQNNQVTISSTNQPKFSTFTQT  
VQRNPSVKTLMSIGGGIANKSAFASMASNPTSRKSFIDSSIRLARSNGFHGLDLDWEYPSAATEMNNFGTLLREWRSAVAA  
EASSTSRPRLLAAAVFYSSDYYSVL YPVQAVASSLDWVNLMA YDFYGPGWSTVTGPPAALNSPSNAGPSGDAGVRAWIQ  
AGLQATQLVLGFPYYGYAWRLSNANSPSYYAATTGSAISPDGSIGYQIRKFIVDNGATTVYNSTVVGDYCYAGTTWIGY  
DDNQSIIVTKVRYAKQKGLRGYFWSHVHGADDNSGLSRSASRAWDATVVTTVIRKFX

>BnaA09g34290D

MGQSVIYKLFNSKILPIQPTSFPLRVLDLSQKKIDLEKNLKLKCYGSNSCVILWFWRIQLQEEGLSSGCRDISRSLGDEEQK  
TLYAKLGDILLTQTAGEVLRSEYLCCSQFGFCGNTSDYCGVGCQQGFCFAPPANGVSVDEIVTQEFFNGIIDQAEIGSVDDS  
RREIAAFFAHVTHETGHFCYIEEINGPSRDYCDENATQYPCNPNGYGRGPIQLSWNFNYGPAGTAIGFDGLNAPETVATD  
PVISFKTALWYWTNRVQPVISQGFATIRAINGALECDGANSATVQARVRYTYDYCRQLGVDPGNLTCX

>BnaC03g19370D

MTLTKTSLVLLCCLLGFYSETVKSQNCGCSPDLCCSQFGFCGTGNDYCGPGCQSGPCTTQAESLGTIVSQSFFDGITNRAGS  
DCAGKGFYTRDAFINAANTFSPFANSVTSLEIATMFAHFTQEVGYFCYIEEINGASQNYCNDKDFPQYPCAAAGKNYYGRGPI  
QLSWNYNYAPCGQSLGLDLSQPELVGSDPTVAFRTALWFWVNNVRPVLVSGFGATIRAINGKVECDGASPDKVNRSRIRY  
YREYCEQLGVDPGNSLSCX

>BnaA05g03440D

MATQISILKNTLILFLFTLTILTKTTFHQHCDFTGCASFMCSSRYGYCGTTADYCGTGCRSGPCSYESGGVGLNAAPRDRIAN  
VVTPAVFAGIMSKVENGCAPKGFYTRQAFITAAQSFPAYRGTVAKREIAAMLAQFSHESDSFCYKEEIARGRYCQASSVYP  
CQPGKNYYGRGPIQITWNYNYGAAGKFLGLPLLTDPDMVARSPEVAFKCAMWFWNEKVRPVVDQGFATRRINGGEC  
GGSPTRVQSRVNRYLEFCRQFGISPGTSLSCX

>BnaA05g03430D

MATQRAILQNALILFLFTLTILTKTAFSQNCGTTGCARNLCCSRYGYCGTTAAYCGTGCRSGPCSSRTTPIPTPSGGGGGLN  
ADPRDTIANVVTLVFNSSIMSKVGNPCAKGFYTRQAFISAAQSFPAYRGTVAKREIAAMLAQFSHESGSFCYKEEIARGRY  
CQASTVYPCQPGKNYYGRGPIQITWNYNYGAAGKFLGLPLLTDPDMVARSPEVAFKCAMWFWNQNVRLDQGFATT  
RKINGGECNGRRPAAVQSRVNRYLEFCRLFGITPGTSLSCX

>BnaA05g03420D

MNYAKTTSRNDQFAILLTLFFLILTVSKPVASQNCGCASGLCCSSAGYCGTTDAYCGEGCKEGPCCKNSESDCKGRGFYTH  
ETFMAAANA YPSFGATISKREIAAFFAHVAQETGFLCHIEVDGPAKAAARGEYCDTTKPEFPCVPGKYYGRGAIQLSWNY  
NYGPCGRDLNEGDLATPEKVAQDQVLAFAKASFWYWTNNVRSFFKSGFGPTIKAVNSMECTGTGVPSETAANRIRYFQDY  
CMKLDVLPGENLTCX

>BnaC07g30330D

MSNIKFLKPVLSFFFFISCCFCKPSHSSRGIAIYWQNGFEGSLSATCATGRYAYVNIAFLVKFNGGQTPELNLGHCNPAAN  
TCTHFGAQVKTQRRGIKVMLSLGGAIGNYSIGSREDAKMVADYLWNNFLGGKSSARPLGDAVLDGIDFNIELGSPQHW  
DLVRFLSNFHRGRKVYITGAPQCPFPDDLMSALKTRLFYVWVMFYNNPPCQYTSGDQSLFHSWKTWTTSVTAQKIF  
LGLPAAPEAAGGGYIPADVLVSQILPTVKSRKYGGVMLWSKFWDDKNGYSSSIVARVX

>BnaA03g20340D

MATHQRVILFLFTLTITKTIVFSQHCSTTGACAGNLCCSRYGYCGTTSAYCGTGCRSGPCSSGPTVSPPTGGTGLNAEPRD  
TIANVVVTQSFFDGIMSKVGNPCAKGFYTRQAFIDAAQSFPAYQGA VSKREIAAMLAQFSHESGNFCYKEEIARGRYCQAS  
TVYPCQPGKDYGRGPIQITWNYNYGAAGKFLGLPLLTDPDMVARSPEVAFKCAMWFWNQNVRLDQGFATRRING  
GECNGRRPAAVQSRVDRYLEFCRTFGITPGTSLSCX

>BnaA03g20330D

MATHNVLLKNALMIFLFTLTIMTETAFAFSQNCGKTGCKGNMCCSRWGYCGTTNAYCGTGCSGQSGPCKSKPKPTPTPSGSGGL  
NAGPRGTIASVVTAPAFFNGIMSKVGRGCPAKGFYTRQAFIAAAQSFAAYKGTVAKREIAAMLAQFSHESGSFCYKEEIARG  
RYCSPSTTYPCQPGKNYYGRGPIQITWNYNYGAAGKFLGLPLLTDPDMVARSPTVAFKCAMWFWNKNVRPVLVSRGFGAT  
TRRINGGECDDGRPAAVQSRVNHLYDFCKKLGVTPTGNLKCX

>BnaA03g20320D

MSNRNATVENALVFFLLAFVMAKTIVFSQNCQSTGCPGLKECCSSWGSGLKDDQCGFWCFGLCHLKNKSYGFNYNVS  
AGPRGPISIVTSPSLFKRIMSKVGNPCAKGFYTHQAFISAVKSFQAYKGTVAKREIAAILTHFAHGSKGFCYKEDKARGRY  
CSPSKYPCPEPKQYYGRGPLQSIRWNEYGAAGIFLRLPMLKDPDMVAHSPEVAFKLALWFWTTNVRPALYLGFGETSK  
RVDGRLCDNLHPDDTKNLVKYVDLCKILGVTPTDEGLSCX

>BnaA03g20310D

MALTKLSLVFLCFLGLYSETVKSQNCGCAPNLCCSQFGYCGSTDAYCGTGCRSGPCRSPGGTSPPPGGGSVGSIVTQAFFN  
GIINQAGGGCAGKNFYTRDSFINAANTFPNFANSVTRREIATMFAHFTHETGHFCYIEEINGASRDYCDENNRQYPCAPGK  
YFGRGPIQLSWNYNYGACGQSLNLLGQPELVSSNPTVAFRTGLWFWMNSVRPVLNQGFGATIRAINGMECNGGNSGA  
VNARIRYRDYCGQLGVDPGNLSCX

>BnaA03g20300D

MVSKKISLTLSSLLSFYSEIVKSNQNCNPPNVCCSQFGYCGTTAAHCSPTCRSGFFDGIINQAGNGCAGKRFYTRDTFINAT  
TTFPSFANSITKREIATMFAHFTYQTHGFCYIEEINGASRSFCDQSNRQYPCAPGKSYHGRGPLLSWNYNYGPCGQSLGLD  
LLLQPELVSSNPVVAFRAAMWFWMKSVRVLNQGFATIRAISSELCNENRNLGAVNARIRYYRDYCGQLGVDSGANVTC  
X

>BnaA03g20290D

MANNAKSTTKKHPLVLLTTLVSVLITVSKPVTSQNCGCASDFCCSKWGYCGQTEDYCGDGCREGPCQGGGGDAVSLEETV  
TPEFFNSIISQARDGCAGKGFYSHNAFIAAANSYPSFGSSISKREIAAFFAHVTHETEFMCYIEEIDGPAKAEDYCDKENTDFP  
CAPGKGYGRGPIQLSWNYNYGQCGRDLNENILASPEKVAQDPALAFKTAFFWFWTTNVKGFKNQGFATIRAINGMECS  
GRNPATVEKRIGYFRDYCGKLGVEPGDNLSCX

>BnaC04g09720D

MALTKISLILFLCLLGRSGPCTGTQGGNLGTIVSQAFFNINRADNGCAGKRFYTRDSFISAANTFPNFANSVTRREIATMF  
AHFTQEVGYFCYIEEINGASRNYCDDKNFPQYQCAPGKTYGRGPIHLGQDLLRQPELVSSNPVLAFTALWFWVNNVRPV  
LNQGFATIRAINGDLESWCGPWSX

>BnaC08g01540D

MVTIRSASVFIVVLLAVSTLALVANGEDKTIKVKVKGKVVCTQGWECVWWSEYCCNQTISDYFQVYQFEQLFAKRNTPV  
AHAVGFWDYQSFITAASLYEPLGFGTTGGKLMGQKEMAAFLGHVASKTSCGYGVATGGPLAWGLCYNREMSPSQSYCDE  
SWKFKYPCSPGAEEYGRGALPIYWNFNYGAAAGEALKADLLNHPEYIEQNATLAFQAAIWRWMTPIKKAQPSAHDIFVGN  
WKPTKNDTLSKRGPSFGTTMNVLYGEYTCGQGDIEPMNIVSHYLYFLDLLGIGREDAGPNEELSCAEQKAFNPSTAPSSSS  
SX

>BnaC09g04600D

MSNIKFKHVLVYFVFLIFLLSKSSDAYGGIAIYWGQNGNEGNSSTCATGRYAYVNVAVLKVFGNGQTPELNLAGHCNPA  
ANTCTHFGSQQKDCQSRGKIVMLSLGGGIGNYSIGSREDAKVVANLWNNFLGGKSSSRPLGDAVLDDGIDFNIELGSPQYY  
DDLARFLSKYGVSGRKVYLTGAPQCPFPDRMGSALDTELFDYVWVQFYNNAPCQYTSNGTKSLFDSWNTWTTSTVAQK  
IFLGLPAAPQAAGSGYIPDILISQILPTLKEKSKYGGIMLWSKFWDDQNGYSSSILASVX

>BnaA10g01020D

METRRREVAFLAQISHETTGGWPTAPDGPYAWGLCFKEEISPQSNYCDSSNTEWPCFSNKTYHGRGPIQLSWNYNYGPA  
GRALGFDGLRNPEIVANNSVIAFQTALWFWMTEQSPKPSCHDVMIGRYMPTEADLAANRTGGFGLTTNIINGGLECGIAGD  
GRVNDRIGFYQRYAGLLNVGTGPNLDCENQRPFAX

>BnaA03g26330D

MSVEMLRSSPLVKASYYYLNSGKKFDTTTTIDSTVSTHLFWAFAQIDRSSHKVDISTINLPQFYKFTENDEATTNKLQYLLSIG  
GKNAEKILFDSMTRTLENRKAFIDSSISVAREYGFHGLDLAWEYPSNIVEMANFKKLIEEWRVAVEKESENTGLPLLLTAA  
VHYSPTYNSVQYPVQAIADNLDNFVNIMSDFYGPWSDVTGPPAALYDPSNPAGISGDSGLRKLWDANLPAKKAVALGFSY  
CGWAWKLEDPKADGYDAATDGAAITPDGSVTYDEIKDYVSSGAATYHDPVVGFYCHAGTTWIGYDDNQSIVSKVKYA  
KLNGLLYFSWHLAADYNGGLSRAASLAWDTTATTGKX

>BnaC03g31740D

MPRRTYLVALRNDVSVRHTMARRREKSSPATESSERRKNRDESEPRDGEPSDRRLITVFVFFVIVIPAVSMAYVKVFA  
DRVIETEPSIRQKGIKTDIHFQEILTEHSKASENSSARHYDYPVLAAYITPWNSKGYDMAKIYNSKFTHLSPVWYDLKSQNG  
LVLEGRHNADKQWIELRARGNAMILPRVVLEAVPEELLSKKKLRGKAIKLIVTECKEMEYDGIVLESWSRWAA YGVLHD  
PDMRKMALQFVKQLGDALHEQHMQFMYVIGPPRSDTLQMYDFGPEDLKFLKDSVDGFSLMTYDFSNSQNPAPLKIWI  
DLTLKLLGSSNNVDSSLARKVLLGLNFYGNDFAISSGGGGAITGRDYIALQKHKPALHWDKESGEHLFMYRDDKNIKH  
AVFYPSLMSILLRLENARLWIGISIWEIGQVLSLKVQVSILCSYTEDISSENKEKEKDRERAMEALKTASFSPVLSDK  
RSETRKPFSLPSLFPKPKPKPISQESLFRSFGGLALLTSVLSSATAPAILTYEEALQSTTSPSSFDSDGLIDGISSFVTDNPLV  
IAGGVAFAVFPVLSQVLNKKPKSFGVESAKNAYTKFGTDENVQLLDIRAAADLRQVGSNIKGLGKNTVSAVYNGEDKT  
GFLKLSLKFDPENTTLFILDKFDGNSSELVAELVALNGFKSAAYAIDGAEGPRGWVNSGLPWIEPKNLSLDLSSLTDSISG  
VFGESSDGVSAIGVAAAAGLSVLAFTETIETILQLLGSAAALVQLAGNKLLFAEDRKQTLKQVDEFLNTKVAPKELVDELKDI  
GKAFLPLSTSSKALPPAAEGATTTTVDEKEPEPAIKAAIAQVNSEPAIEAATAQVTLEPATKAASEQVITEAKLKSYPRLSP  
YASYPDLKPPTSPTPVSSKGLPAPAPVAAEAATTTIVDEPEPELEPAIKAATAQVNSEPAKAATEQVITEAKPKSYRPLSPY  
ASYPDLKPPTSPTPSHPX
